# Naïve individuals promote collective exploration in homing pigeons

Gabriele Valentini<sup>1,2</sup>, Theodore P. Pavlic<sup>2,3,4,5,6</sup>, Sara Imari Walker<sup>1,3,6</sup>, Stephen C. Pratt<sup>2,6</sup>, Dora Biro<sup>7,8</sup> & Takao Sasaki<sup>9</sup>

<sup>1</sup>Arizona State University, School of Earth and Space Exploration, Tempe, AZ 85287, USA

<sup>2</sup>Arizona State University, School of Life Sciences, Tempe, AZ 85287, USA

<sup>3</sup>Arizona State University, Beyond Center for Fundamental Concepts in Science, Tempe, AZ 85287, USA

<sup>4</sup>Arizona State University, School of Computing, Informatics, and Decision Systems Engineering, Tempe, AZ 85287, USA

<sup>5</sup>Arizona State University, School of Sustainability, Tempe, AZ 85287, USA

<sup>6</sup>Arizona State University, ASU-SFI Center for Biosocial Complex Systems, Tempe, AZ 85287, USA

<sup>7</sup>University of Oxford, Department of Zoology, Oxford, OX1 3PS, UK

<sup>8</sup>University of Rochester, Department of Brain and Cognitive Sciences, Rochester, NY 14627, USA

<sup>9</sup>University of Georgia, Odum School of Ecology, Athens, GA 30602, USA

**Abstract.** Group-living animals that rely on stable foraging or migratory routes can develop behavioural traditions to pass route information down to inexperienced individuals. Striking a balance between exploitation of social information and exploration for better alternatives is essential to prevent the spread of maladaptive traditions. We investigated this balance during cumulative route development in the homing pigeon *Columba livia*. We quantified causal interactions within pairs of birds in a transmission-chain experiment and determined how birds with different levels of experience contributed to the exploration–exploitation trade-off. Newly introduced naïve individuals were initially more likely to initiate exploration than experienced birds, but the pair soon settled into a pattern of alternating leadership with both birds contributing equally. Experimental pairs showed an oscillating pattern of exploration over generations that might facilitate the discovery of more efficient routes. Our results introduce a new perspective on the roles of leadership and information pooling in the context of collective learning.

## Introduction

The coordinated motion of groups is a widespread phenomenon observed in multiple taxa (Vicsek and Zafeiris 2012). Among other adaptive advantages, such as increased energetic efficiency and decreased odds of predation (Krause and Ruxton 2002), collective motion also allows group members to increase their sensory and cognitive capacity (Berdahl et al. 2013; Gelblum et al. 2020) and to acquire valuable social information for navigation (Couzin 2009; Couzin et al. 2011). In many animals, this social information concerns well-established foraging or migratory routes that can, in some species, persist over successive generations (Helfman and Schultz 1984; Sasaki and Biro 2017; Jesmer et al. 2018). Knowledge and skills that accumulate over generations can provide groups with an enhanced ability to solve difficult problems (Biro, Sasaki, and Portugal 2016). Not only can later generations build on the success of earlier ones, but

42 the introduction of new members, even those with no prior knowledge, adds diversity that can enhance the  
43 group's behavioural solutions (Mehlhorn et al. 2015). As is often the case (Hills et al. 2015), behavioural  
44 patterns that lead to a search for improvement, whether individually, socially, or over multiple generations,  
45 involve an exploration–exploitation trade-off. In navigation problems, both solitary individuals and groups  
46 have to balance between exploiting previously acquired information necessary to navigate a known route  
47 and exploring for additional information that might allow them to approach the optimal route (Fu and Gray  
48 2006). However, how moving collectives compromise between these tasks has received limited attention.

49 Understanding the exploration–exploitation trade-off is complicated by ambiguity about group  
50 leadership (Couzin et al. 2005; Garland et al. 2018). Although some collectives (e.g., ants, honeybees) can  
51 allocate certain individuals to spatial exploration while others continue to exploit accumulated information  
52 (Hills et al. 2015), individuals in cohesively moving groups are highly coupled and can only benefit from  
53 compromising between exploring and exploiting if they do so in unison. If they are to stay together, the  
54 group must reach consensus between following a known route or departing from it to find better routes,  
55 foraging patches, or temporary resting locations. Elucidating whether different group members contribute  
56 differently to this process is crucial to understanding how groups compromise between exploration and  
57 exploitation.

58 We investigate this question in the context of navigation through natural landscapes using the homing  
59 pigeon *Columba livia* as our model system. After successive homing journeys from a given release site,  
60 pigeons develop stable idiosyncratic routes that are followed with high fidelity (Meade, Biro, and Guilford  
61 2005; Guilford and Biro 2014). These birds rely on sequences of localized visual landmarks to recapitulate  
62 familiar yet individually distinct routes (Biro, Meade, and Guilford 2004; Meade, Biro, and Guilford 2005).  
63 Each route is learned in a gradual process starting with an exploration phase that samples new landmarks,  
64 from which the bird eventually converges upon a stable sequence of landmarks (Biro, Meade, and Guilford  
65 2004). Experiments with paired birds show that route information can be passed from experienced birds to  
66 naïve individuals through social learning (Pettit, Flack, et al. 2013) and can be modified through information  
67 pooling when individuals with different idiosyncratic routes share information to reach a compromise  
68 between their routes (Biro et al. 2006). Although learning generally improves route efficiency, both social  
69 learning and information pooling tend to reach a plateau beyond which further improvement in efficiency is  
70 not seen. However, for birds flying together, the introduction of a naive individual in place of an experienced  
71 one effectively leads to the resumption of exploratory behaviour and further route improvement (Sasaki and  
72 Biro 2017). Yet, it remains unclear to what extent a bird's prior experience influences the balance between  
73 exploration and exploitation and how birds with potentially different route preferences jointly shape a route.

74 Indeed, the mechanisms underlying how different individual preferences are combined into a collective  
75 outcome is one of the key foci in studies of collective animal behaviour. Broadly, group decisions can range  
76 from despotic with a single leader to democratic in which input from different individuals is aggregated to  
77 reach consensus (Conradt and Roper 2003). Evidence of both despotic and democratic decisions exists in  
78 homing pigeons (Biro et al. 2006; Nagy et al. 2010; Jorge and Marques 2012). When leadership is defined

79 as disproportionate input into collective navigational decisions, either through spatial position (Pettit, Perna,  
80 et al. 2013), route similarity (Flack et al. 2012), or directional correlation delay (Nagy et al. 2010), a number  
81 of different factors have been shown to play a role in it. Leadership dynamics are influenced by individual  
82 differences among birds in fidelity to their own routes (Freeman et al. 2011), their typical flight speed (Pettit  
83 et al. 2015), their personality (Sasaki et al. 2018), as well as their level of experience (Flack et al. 2012).  
84 Moreover, equally experienced birds are known to come to a compromise by averaging their idiosyncratic  
85 routes so long as the pair's route remains within a threshold distance from each bird's favoured one – a low  
86 level of conflict. Higher levels of conflict lead instead to a splitting of the pair or to the emergence of a single  
87 leader (Biro et al. 2006). Nonetheless, experience alone is unable to fully recover the leadership structure  
88 characteristic of larger flocks (Watts et al. 2016). Spatial position offers some insight into leadership: on  
89 average, birds flying closer to the front of the flock have a stronger influence on the flock's directional  
90 choices than birds flying at the back (Nagy et al. 2010; Pettit, Perna, et al. 2013). Even so, the moment-to-  
91 moment relationship between leadership and level of experience remains unclear.

92 Leader–follower interactions of this sort can be accurately captured using information-theoretic  
93 measures that quantify causal relations in terms of predictive information (Butail, Mwaffo, and Porfiri 2016;  
94 Kim et al. 2018; Crosato et al. 2018; Ray et al. 2019; Valentini et al. 2020). One of these measures, *transfer*  
95 *entropy*, quantifies information about the future behaviour of a focal individual that can be obtained  
96 exclusively from knowledge of the present behaviour of another subject (Schreiber 2000). Transfer entropy  
97 measures information transferred from the present of the sender to the future of the receiver (Lizier and  
98 Prokopenko 2010). It explicitly accounts for autocorrelations characteristic of individual birds' trajectories  
99 (Mitchell et al. 2019) by discounting predictive information available from the sender's present that is already  
100 included in the receiver's past. Furthermore, it does not require a model of how sender and receiver interact,  
101 and it is well suited to study social interactions both over space and over time (Lizier, Prokopenko, and  
102 Zomaya 2008). Consequently, transfer entropy can capture causal interactions due not only to alignment  
103 forces (Nagy et al. 2010) but also to attraction and repulsion forces that result in temporarily unaligned  
104 states (Pettit, Perna, et al. 2013).

105 We study collective decision making and the exploration–exploitation trade-off using an experimental  
106 analysis of cumulative route development in homing pigeons (Sasaki and Biro 2017). In these experiments,  
107 pairs consisting of a naïve and an experienced bird were required to successively solve the same homing  
108 task a fixed number of times. This set of paired flights allowed the naïve bird to acquire knowledge of  
109 localized visual landmarks necessary for homing. The more experienced bird was then replaced with a new  
110 naïve individual and the learning process was repeated through five generations of replacement in a  
111 transmission-chain design. Route efficiency was measured as the ratio of the beeline distance between the  
112 release site and the home loft (*i.e.*, the ideal optimum) and the actual distance travelled by birds. The results  
113 showed that, although homing efficiency dropped considerably every time a new naïve bird was introduced,  
114 transmission-chain pairs continued to improve within and over generations, eventually outperforming both  
115 solo and fixed-pair controls (respectively, 0.92 efficiency versus 0.83 and 0.85). In contrast, the efficiency

116 of solo and fixed pairs plateaued after they had first established their idiosyncratic routes (around the 9<sup>th</sup>–  
117 10<sup>th</sup> release for the former and the 7<sup>th</sup>–8<sup>th</sup> release for the latter).

118 The continued improvement seen in transmission chains might result from a variety of decision-making  
119 mechanisms ranging from fully despotic to increasingly democratic. A simplified perspective of this  
120 continuum allows us to consider four alternative hypotheses. In two of these alternatives, a single despotic  
121 leader, either the naïve or the experienced bird, determines the entire homing route. Whereas evidence of  
122 social learning (Sasaki and Biro 2017) suffices to dismiss the possibility of leadership by the naïve  
123 individual, leadership by the experienced individual could still be the only process in place if social learning  
124 is unidirectional and the naïve individual merely triggers the experienced bird to resume and lead  
125 exploration. Under the other two hypotheses, birds could pool their personal information by means of  
126 democratic processes based on moment-by-moment integration of individual preferences or transient,  
127 alternating leadership (Conradt 2012). The third hypothesis entails the experienced bird contributing only  
128 its past route information and relying instead on the naïve individual for the discovery of route innovations.  
129 If this hypothesis holds, we expect the naïve bird to disproportionately lead phases of exploration. Otherwise  
130 (fourth hypothesis), both experienced and naïve birds might contribute through exploration to the discovery  
131 of new information.

132 We discriminated between these alternative hypotheses by using transfer entropy to reveal the extent  
133 to which birds influence each other and to investigate if relative spatial position can accurately predict  
134 leader–follower dynamics. On this basis, we studied the contribution of each bird to the exploration–  
135 exploitation trade-off over different stages of route development. This exploration–exploitation perspective  
136 of homing route development allowed us to characterize the efficiency of choices made by birds over the  
137 course of the experiment and to shed light on the superior performance of experimental pairs with respect  
138 to solo and fixed pairs controls.

139

## 140 **Results**

141

142 **Birds pool information.** The social-learning hypothesis under which the naïve bird passively copies the  
143 idiosyncratic route of the experienced one (*i.e.*, the despotic leader) entails a transfer of information that is  
144 unidirectional – from the experienced to the naïve bird. Instead, under the two alternative hypotheses based  
145 on democratic decision-making, the two birds rely on bidirectional information transfer to pool information  
146 and increase the efficiency of their route (Pettit, Flack, et al. 2013; Sasaki and Biro 2017). We rejected the  
147 unidirectional social-learning hypothesis by finding causal evidence of information pooling: the naïve bird  
148 actively influenced the behaviour of the experienced one for a large portion of the parameter space  
149 (Figure S1). As is common practice with these measures (Porfiri 2018), we selected the parameter  
150 configuration that maximized the total transfer of information between the two birds (one sample every 0.2  
151 seconds,  $k = 10$ ) . This was maximal for the shortest sampling period (*i.e.*, prediction interval) of 0.2  
152 seconds and progressively decreased towards 0 for larger periods up to 4 seconds, indicating that the effect  
153 of an interaction between birds was transitory and lasted for a limited period of time. Using this configuration,

154 we compared measurements of information transfer against those of a surrogate dataset created by pairing  
 155 trajectories of birds that were not flown together. We found that levels of mutual influence between birds  
 156 that flew together were significantly higher than those observed in the surrogate dataset both overall and  
 157 for each generation separately (Mann–Whitney–Wilcoxon, columns 2 and 3 of Table S1).  
 158

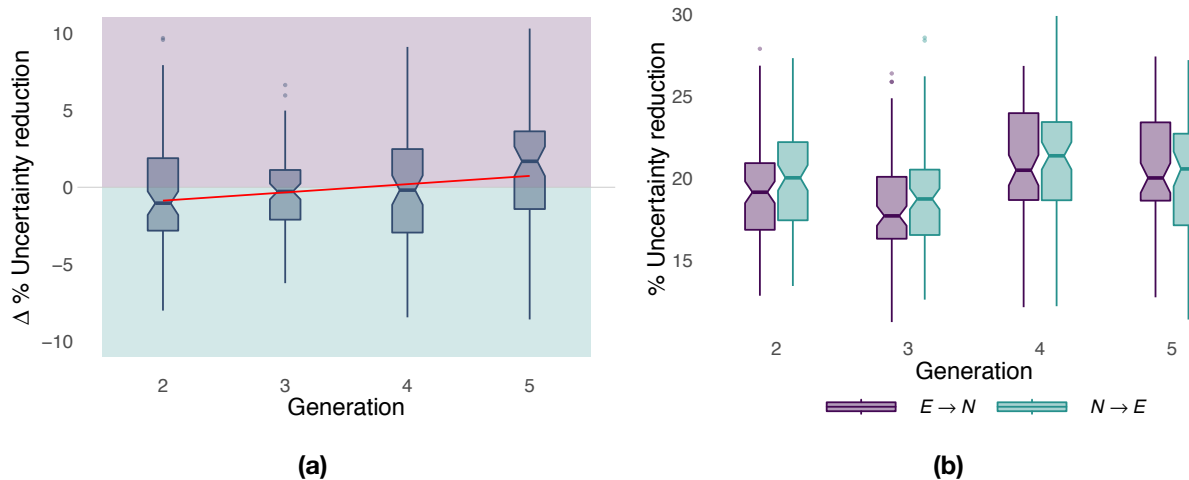

159 **(a)** **(b)**  
 160 *Figure 2. Panel (a) shows the net predictive power of the two birds,  $\tilde{T}_{E \rightarrow N} - \tilde{T}_{N \rightarrow E}$ , over generations, where  $\tilde{T}_{X \rightarrow Y} =$   
 161  $\frac{\tilde{T}_{X \rightarrow Y}}{H_Y} \cdot 100$  with  $X, Y \in \{E, N\}$ , highlighting which bird is more informative (purple for the experienced bird, green for the  
 162 naïve bird). The red line corresponds to a linear fit over generations using the Theil–Sen estimator. Panel (b) shows  
 163 the predictive power of naïve and experienced birds over generations measured as the percentage  $\tilde{T}_{X \rightarrow Y}$  of uncertainty  
 164 reduction about one bird given by the other.*

165  
 166 During the first two generations of paired flights (Figure 2a, paired analysis), when there was a large margin  
 167 to improve the efficiency of the pair’s trajectory, the naïve bird was more informative than the experienced  
 168 one, evidenced by a stronger influence over the latter. At generation 4 there was a balance between the  
 169 two birds whereas the experienced bird eventually became the better source of predictive information in  
 170 the last generation. A linear fit over generations of the paired comparison (Figure 2a, red line) showed an  
 171 increasing influence of the experienced bird over the naïve one (Theil–Sen estimator, slope 0.534,  $p <$   
 172  $0.001$ ). Additionally, a non-paired comparison of the same results revealed that, although the naïve bird  
 173 had, on average, a marginally higher predictive power than that of the experienced one (18.7–21.4% versus  
 174 17.7–20.5%), both birds explained a large portion of each other’s behaviour (Figure 2b) suggesting non-  
 175 trivial leadership dynamics. These results do not show whether different levels of experience within the pair  
 176 led to asymmetric contributions of birds to route development, with the experienced bird providing only its  
 177 past route information and the naïve bird in charge of discovering route innovations, or if both birds  
 178 contributed to the exploration for possible route alternatives. To discriminate between these remaining  
 179 hypotheses, we first developed the means to evaluate leadership on a moment-to-moment basis.  
 180

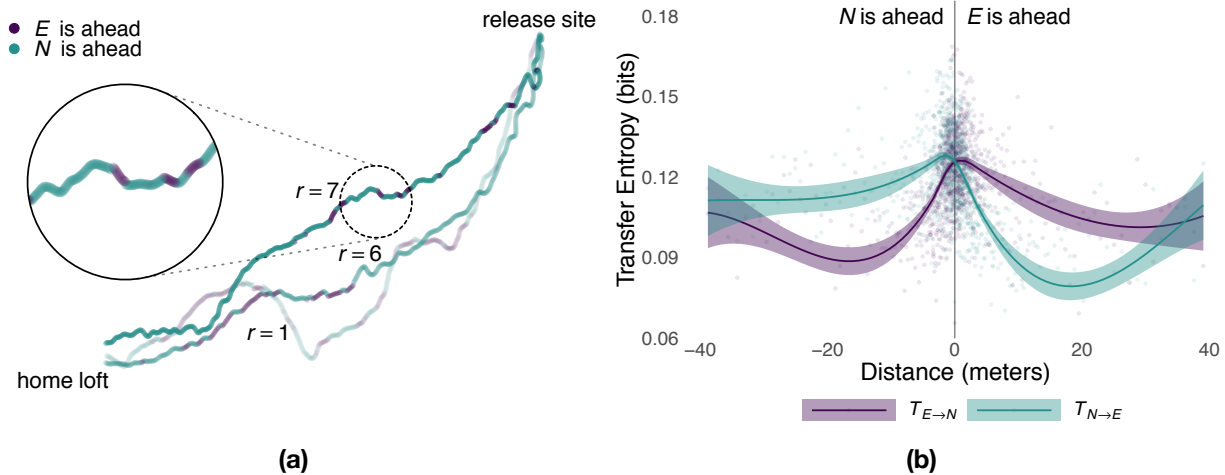

181

182 *Figure 3. Panel (a) shows sample flight trajectories for a number of different releases,  $r$ , of the same pair of birds.*  
 183 *Colors highlight which bird is ahead of the other during different segments of the route.*  
 184 *Panel (b) shows the local transfer of information (mean and 0.95 confidence interval) between the experienced bird and the naïve one as a*  
 185 *function of their relative distance (colors represent the direction of information transfer) estimated using smoothed*  
 186 *conditional means.*

187

188 **Relative position determines temporary leadership.** Consistent with information sharing within each  
 189 pair, we found that experienced and naïve birds repeatedly switched their positions at the front and back of  
 190 the pair (Figure 3a). Previous studies found evidence that birds that spent, on average, more time at the  
 191 front of the flock had a tendency to assume leadership roles (Nagy et al. 2010; Pettit, Perna, et al. 2013).  
 192 To see whether this average relationship between leadership and position holds at each point in time, we  
 193 investigated the spatiotemporal dynamics of information transfer (Lizier, Prokopenko, and Zomaya 2008).  
 194 We did so by considering the amount of predictive information obtained by each bird as a function of the  
 195 distance from the experienced to the naïve bird projected over their mean direction of motion (Figure 3b).  
 196 We found that within a distance of up to 30 meters, the bird flying ahead was consistently more informative  
 197 than that flying in the back. This is not only further evidence that the bird flying ahead acts as the leader,  
 198 influencing the path of the follower behind it, but, because of its finer grain, it also enables relative distance  
 199 between birds to be used as a (more parsimonious) moment-to-moment measure of causal influence within  
 200 the pair.

201 The experienced and the naïve bird alternated leading segments of the route whose duration was  
 202 stochastic and resembled a log-normal distribution (see Supplementary Material). Although the naïve bird  
 203 flew at the front of the pair for longer segments (Whitney–Mann–Wilcoxon,  $p < .047$ ,  $W = 56865638$ ), the  
 204 difference was very small (0.3 seconds) and largely driven by the flights of one generation. Indeed, for all  
 205 generations but the third ( $p < .001$ ,  $W = 6588674$ ), the distribution of consecutive time spent at the front of  
 206 the pair by the experienced bird cannot be distinguished from that of the naïve individual (Table S2). The  
 207 tails of these distributions approach that of an exponential distribution and suggest that temporary  
 208 leadership might be decided on the basis of stochastic processes (Biro et al. 2006) instead of certain rules  
 209 such as fixed periods of time. Moreover, with the exception of generation 3 where 54% of the route was led



210 by the naïve bird (Wilcoxon signed rank-test,  $p = .03$ ,  $V = 1851$ ), there was no significant difference in the  
 211 proportion of a flight spent by each bird at the front of the pair (Table S3) suggesting a relatively egalitarian  
 212 relation between birds despite differing levels of experience.

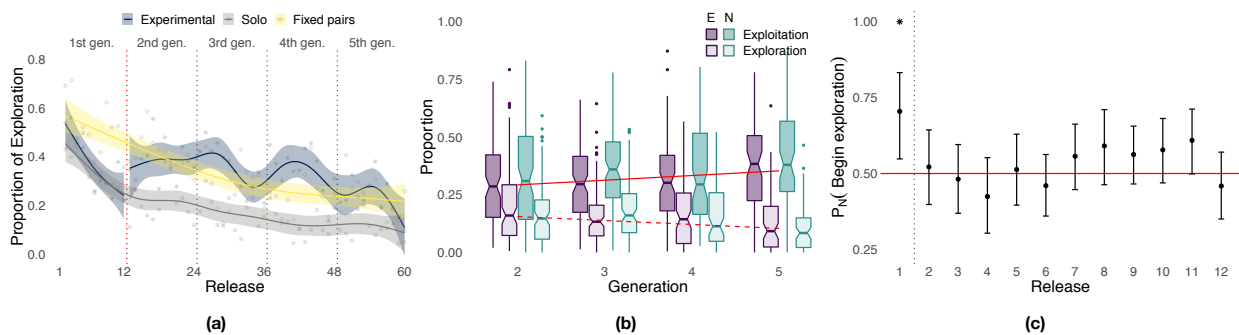

213  
 214 *Figure 4. Panel (a) shows the proportion of exploration over releases for the experimental group (the red dotted vertical*  
 215 *line separates solo flights at generation 1 from paired flights at generations 2-5), the solo control, and the fixed-pairs*  
 216 *control. Smoothed lines are computed using generalized additive models using shrinkage cubic regression splines*  
 217 *(mean and standard error); points represent averages for individual releases. Panel (b) shows the proportion of a flight*  
 218 *led by each bird during phases of exploration and exploitation in the experimental treatment. Darker colors correspond*  
 219 *to exploitation, lighter colors to exploration; purple represents the experienced bird, green the naïve one; red lines*  
 220 *represent linear fits to data pooled from both birds using the Theil–Sen estimator (slopes and p-values: respectively,*  
 221 *0.0203,  $p = 0$  for exploitation and  $-0.0171$ ,  $p = 0$  for exploration). Panel (c) shows the probability for the naïve*  
 222 *individual to initiate phases of exploration over releases (exact binomial test,  $p < .01$  for release 1).*

223  
 224 **Exploration–exploitation dynamics explain flight performance.** Sasaki and Biro (2017) previously  
 225 showed that flight efficiency varies across treatments with experimental pairs eventually outperforming both  
 226 fixed pairs of birds and solo individuals. The discovery of route innovations and, in particular, how birds with  
 227 different levels of experience contribute to this task, is the key to the superior performance of experimental  
 228 pairs. To understand this phenomenon and thus shed light on the pair’s information pooling mechanism,  
 229 we investigated how pigeons balance between exploitation of known information, closely following ( $< 300$   
 230 meters) their most recent route, and exploration for possible route improvements. To do so, we labelled  
 231 segments of flight trajectories as a function of the point-to-point distance of a focal trajectory from the  
 232 immediately preceding one (*i.e.*, baseline) and compared the exploration–exploitation dynamics both  
 233 across treatments and between experienced and naïve birds.

234 During the initial part of the experiment (Figure 4a, first 12 releases), exploration decreased steadily  
 235 in all conditions with birds that flew individually in the experimental group (*i.e.*, generation 1) performing  
 236 similarly to those of the solo control (respectively, 36.7% and 34.2%) whereas fixed pairs of birds explored  
 237 significantly more (51.7%, Whitney–Mann–Wilcoxon,  $p < .001$ , Table S4). However, while exploration  
 238 steadily decreased for solo and fixed pairs of birds in the successive 48 releases, experimental pairs  
 239 showed a markedly different pattern of exploration oscillating over generations (Figure 4a, releases 13–  
 240 60). Each time a new naïve individual was paired with an experienced one (dotted vertical lines), exploration  
 241 increased for about 5 to 6 releases, reaching values well beyond those of both solo birds and fixed pairs;  
 242 then exploration decreased within a few releases (2 to 4) to the same levels as those of fixed pairs. On  
 243 average during generations 2 to 5, experimental pairs explored (32.9%) significantly more than both solo

244 (15.7%,  $p < .001$ ) and fixed pairs of birds (29.3%,  $p = .0456$ ). These results also held when exploration and  
245 exploitation were defined with respect to the last release of the previous generation. Under this model,  
246 differences between experimental and fixed pairs were even more pronounced, with the former  
247 characterized by 46.6% exploration and the latter by only 32.4% ( $p < .001$ , Table S5 and Figure S6). The  
248 inferior flight efficiency of solo and fixed pairs of birds might thus be explained, at least in some measure,  
249 by a lower likelihood to discover route improvements due to limited exploration.

250 The superior homing performance of experimental pairs is suggested to be rooted in their ability to  
251 select novel portions of a route introduced by the naïve individual that are more efficient while discarding  
252 inefficient ones (Sasaki and Biro 2017). Under this hypothesis, we expect to observe, not only increasing  
253 homing efficiency over generations, but also an asymmetric pattern of leadership in which the naïve  
254 individual leads periods of exploration and the experienced one leads periods of exploitation. We found  
255 instead no significant difference between the contributions of the experienced bird and those of the naïve  
256 one both overall and within generations (Figure 4b and Table S7). The sole exception is represented by  
257 generation 3 during which the naïve bird contributed more than the experienced one to exploitation  
258 (Wilcoxon signed-rank test,  $p = .035, V = 1871$ ). Experienced and naïve birds led the pair with  
259 approximately the same frequency in both exploration and exploitation, suggesting that deviations from  
260 established routes were not caused only, or even mainly, by the naïve bird (see also Figure S4, inset). We  
261 did find evidence of behavioural asymmetries, in that transitions from exploitation to exploration were  
262 marginally more likely to be initiated by naïve birds (exact binomial test,  $p = .042, n = 964$ , Table S8);  
263 however, this result was driven by those of generation 3 ( $p = .02, n = 301$ ) whereas no difference was  
264 detected in other generations. Transitions from exploration to exploitation were equally likely to be initiated  
265 by the two birds both overall and within each generation. However, when transitions are considered over  
266 the 12 releases composing each generation (Figure 4c), the naïve individual was more likely to initiate  
267 phases of exploration during the first release ( $p < .01, n = 44$ , Table S9) doing so 70.5% of the time  
268 compared to 29.5% for the experienced bird. After the first release, transitions that initiate phases of  
269 exploration were about as likely to be initiated by either of the two birds independently of their level of  
270 experience.

271

## 272 **Discussion**

273

274 For many group-living animals, searching for optimal travel routes can be a complex task as social  
275 information about routes can persist over generations regardless of its quality (Helfman and Schultz 1984;  
276 Sasaki and Biro 2017; Jesmer et al. 2018; Laland and Williams 1998). This search is inherently subject to  
277 a trade-off between the exploitation of well-established route information accumulated over time and  
278 exploration for innovations that constitute potential improvements (Hills et al. 2015). Striking a balance is  
279 fundamental as a pronounced reliance on exploitation of learned information can hinder innovations  
280 (Davies, Krebs, and West 2012) and thus promote the maintenance of potentially suboptimal behaviour



281 and even of maladaptive behavioural traditions (Laland and Williams 1998). Equally, an over-reliance on  
282 exploration without exploiting the rewards of beneficial innovations eventually impedes improvements in  
283 performance over time (Fu and Gray 2006; Mehlhorn et al. 2015).

284 We studied the causal structure of this process in flights of the homing pigeon *C. livia*, as this species  
285 is capable of both social learning and information pooling (Biro et al. 2006; Pettit, Flack, et al. 2013). Of  
286 particular interest for our study is the increase in route efficiency that results from the pairing of naïve  
287 individuals with experienced ones (Pettit, Flack, et al. 2013), including when this happens iteratively over  
288 multiple generations (Sasaki and Biro 2017). Previous work has proposed information pooling as the  
289 underlying mechanism driving this increase in flight performance (Sasaki and Biro 2017). Using transfer  
290 entropy to measure predictive information (Schreiber 2000; Pilkiewicz et al. 2020), we found quantitative  
291 evidence that supports the information-pooling hypothesis in the strength of causal interactions within pairs  
292 of birds. Experienced and naïve birds influence each other's behaviour; about 20% of the future directional  
293 choices of any individual in a pair is explained by the behaviour of the other individual. These results  
294 contrast with our expectations for unidirectional social learning that entails an asymmetric pattern of  
295 leadership with a pronounced role for experienced individuals.

296 Our analysis showed that, in a multi-generational transmission-chain design, the naïve bird has a higher  
297 influence than the experienced one during the early generations. In later generations, as flight efficiency  
298 increases, the experienced bird becomes the better source of predictive information. We can further  
299 hypothesize that, over generations, as birds explore an increasing portion of the search space and exhaust  
300 remaining alternatives, a newly introduced bird should become less likely to contribute productive  
301 innovations, and an increasing proportion of innovations should lead to errors instead of improvement. This  
302 theoretical reasoning is analogous to the diminishing marginal value from returning to a previous location  
303 when searching for an object in space (Stone 1976). From an information-foraging perspective (Stephens  
304 and Krebs 1986; Pirolli 2007), the time invested in harvesting innovations on the introduction of a naïve bird  
305 corresponds to the time invested in attending to a newly discovered patch; at some point, the opportunity  
306 cost of further harvesting becomes too high to justify remaining in the patch. Thus, after the introduction of  
307 a naïve bird, the information-foraging pair shifts from information-harvesting exploration back toward  
308 information-preserving exploitation, as would be expected in an optimal search problem (Stone 1976).

309 How do experimental pairs improve their homing routes over generations? Previous studies where  
310 leadership was defined on the basis of route similarity showed that, in pairs with a large difference in  
311 experience between birds, experienced individuals were more likely to assume leadership (Flack et al.  
312 2012). Still using route similarity, Sasaki and Biro (2017) found evidence of social learning with naïve  
313 individuals learning routes from their experienced partners. Moreover, because newly formed pairs in the  
314 transmission-chain design also improved performance generation after generation, they proposed that  
315 naïve individuals could contribute innovations that pigeons evaluate in terms of route efficiency and prune  
316 away when inefficient. However, defining leadership in terms of causal interactions instead of route  
317 similarity allowed us to show that there is an asymmetric relation between innovators and exploiters only

318 during the initial flight of a newly formed pair. Although leadership is ephemeral and equally shared between  
319 birds during exploration and exploitation independently of their level of experience, over the course of this  
320 first flight the naïve individual disproportionately initiates phases of exploration, attracting the experienced  
321 bird to unfamiliar areas and triggering it to also resume the search. After that, both birds are equally likely  
322 to initiate transitions between exploration and exploitation. Moreover, as it is unlikely that experimental pairs  
323 were merely better than control groups at evaluating efficiency, we believe that their superior performance  
324 is rooted instead in their complex exploration–exploitation dynamics that allowed them to better cover the  
325 search space.

326 Personally acquired information allows solo individuals to improve flight performance (Meade, Biro, and  
327 Guilford 2005) but only to discover routes moderately efficient (consistently within 0.8–0.85 efficiency  
328 across a large number of experiments, reviewed in Guilford and Biro 2014) because solo individuals rapidly  
329 reduce their exploration efforts to seek out novel information. Experimental and fixed pairs of birds on the  
330 other hand explore more and thus outperform solo individuals. Together, two birds have superior sensory  
331 and cognitive capacities compared to single birds (Krause, Ruxton, and Krause 2010) which facilitates the  
332 discovery of better routes that are then learned collectively (Biro, Sasaki, and Portugal 2016; Kao et al.  
333 2014). The reasons why pairs explore more than solo individuals might lie partly with the conflicts  
334 characteristic of newly formed pairs (Biro et al. 2006) if the resolution of conflict, *e.g.*, through averaging  
335 individual inputs, indirectly prompts pairs to explore more and discover route innovations. This hypothesis  
336 could also explain why experimental pairs outperform fixed pairs. Differently from fixed pairs that undergo  
337 a process of mutual habituation as they develop a stable route that likely reduces conflicts, the introduction  
338 of a naïve individual at the start of each generation repeatedly creates an experience imbalance in the  
339 newly formed pair. This experience imbalance could be the source of new conflicts possibly explaining why  
340 experimental pairs reach levels of exploration generally higher than those of fixed pairs. The process of  
341 gradually settling on a joint route over the course of a generation following this initial perturbation is also  
342 reminiscent of the transient effects observed when an ant with outside information joins a group of  
343 nestmates transporting an object: the new information temporarily steers the collective in the right direction  
344 but its effects on collective motion vanish quickly (Gelblum et al. 2015, 2016, 2020).

345 Adopting an explicit exploration–exploitation perspective to study search strategies and doing so  
346 through the use of predictive information to quantify causal interactions has the potential to advance our  
347 understanding of collective navigation in larger flocks. The conceptual framework of exploration and  
348 exploitation as well as the methods we proposed can also benefit researchers studying other taxa that  
349 move in groups with the potential to learn from previous experiences, such as shoaling fish or certain  
350 primates. In principle, this information-theoretic approach could also be applied to the study of information  
351 transfer between the environment and the individuals within a group. The ability to quantify causal  
352 interactions of this sort could shed light on broader questions in ecology involving animals moving in a  
353 group and their environment such as the impact of visual landmarks on navigation or the effects of terrestrial  
354 migration on the environment (Bracis and Mueller 2017; de Guinea et al. 2021).

355

## 356 Materials and Methods

357

358 Data and source code are available in (Valentini et al. 2021).

359

360 **Experimental subjects and procedure.** Data were taken from a previous study on cumulative route  
 361 development in the homing pigeon *Columba livia* (Sasaki and Biro 2017). Pairs of birds composed of an  
 362 *experienced* and a *naïve* bird were released together from the same site and allowed to fly back to the  
 363 home loft. Pairs were created and released over 5 successive generations of a transmission chain, each  
 364 generation lasting 12 consecutive releases of the same pair, according to the following procedure: initially,  
 365 at generation 1, a naïve bird was released alone 12 times, allowing it to develop its own idiosyncratic route  
 366 to the home loft. This bird, now experienced, was then paired with a new (naïve) bird at generation 2, and  
 367 together they performed another 12 flights. This process was then repeated in the next generation with a  
 368 new pair of birds composed of the former naïve bird and of a new naïve one. Data were gathered for a total  
 369 of 10 independent transmission chains, each lasting 5 generations (see Sasaki and Biro 2017 for details).  
 370 Birds flying at an average linear distance greater than 250 meters from each other were not considered as  
 371 pairs and were thus excluded from the analysis, leaving 343 flights with a mean  $\pm$  SD flight duration of  
 372  $8.65 \pm 1.33$  minutes. Additionally, in two control conditions, nine solo birds and six pairs (all initially naïve)  
 373 were released from the same site for a total of 60 releases (the equivalent of  $5 \times 12$  releases for the  
 374 transmission chains).

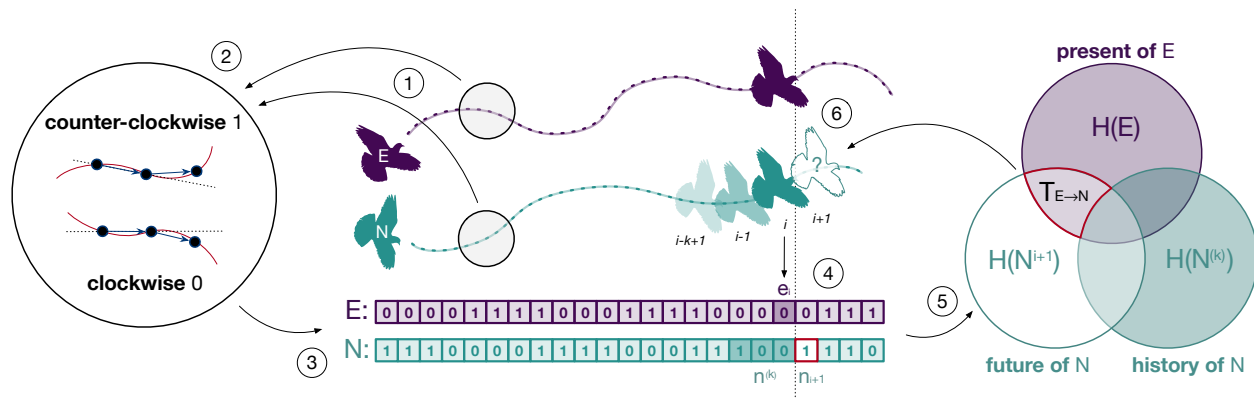

375

376 *Figure 1. Illustration of the methodological approach. The spatial trajectories of an experienced (E) and a naïve (N) bird*  
 377 *(point 1) are encoded as clockwise and counter-clockwise rotations (point 2) which we represent as discrete time series*  
 378 *(point 3). The combination of rotations encoded in both series (point 4) is used to estimate the probabilities required to*  
 379 *compute transfer entropy (point 5) and to determine the influence of one individual over the future behavior of the other*  
 380 *(point 6). This example illustrates transfer entropy from experienced to naïve, but we also computed it for the opposite*  
 381 *direction.*

382 **Data collection and pre-processing.** Flight trajectories of birds were sampled at a frequency of 5 Hz  
 383 using GPS loggers, converted from the geographic coordinate system to the metric system, and projected  
 384 over the 2-dimensional plane (see Sasaki and Biro 2017). Each trajectory consisted of a time-ordered  
 385 series of positions in space,  $(x_i; (x^1, x^2)_i, i \geq 1)$ , see Figure 1 (point 1). We encoded the pattern of rotations  
 386 of each flight using a binary symbolic representation where symbols 0 and 1 represent, respectively, a

387 clockwise and a counter-clockwise rotation (point 2). The direction of rotation was computed as the cross  
 388 product  $\overrightarrow{x_{i-1}x_i} \times \overrightarrow{x_i x_{i+1}}$  between the motion vector at time  $i$  and that at time  $i + 1$ . The rotation is clockwise  
 389 when the product is negative and counter-clockwise when it is positive. We also measured the distance  
 390  $d_{EN}(i)$  of the experienced bird from the naïve one projected over the current direction of motion of the pair  
 391 (cf. Nagy et al. 2010 and Supplementary Material). Using this distance, we then determined the relative  
 392 position of birds over time: when  $d_{EN} > 0$ , the experienced bird was flying ahead of the naïve bird; when  
 393  $d_{EN} < 0$ , it was flying behind. Previous tests using the same GPS loggers showed that these devices have  
 394 a sufficient level of accuracy with a small normally distributed spatial error (SD of 0.05 meters) affecting  
 395 the tracking accuracy of the direction of motion and a relatively larger error (median of 1.69 meters)  
 396 affecting that of the relative position (Pettit, Perna, et al. 2013).

397  
 398 **Measuring information transfer.** We quantified the amount of information transferred between birds  
 399 using information-theoretic measures (Cover and Thomas 2005; Pilkiewicz et al. 2020) estimated from the  
 400 series of rotations of the experienced,  $E = (e_i, i \geq 1)$ , and of the naïve,  $N = (n_i, i \geq 1)$ , birds (Figure 1,  
 401 point 3). We aimed to quantify causal interactions between birds in a Wiener–Granger sense by measuring  
 402 the extent to which the current behaviour of one bird allows us to predict the future behaviour of the other  
 403 (Bossomaier et al. 2016). Here we describe the process for predicting the naïve bird’s behaviour from that  
 404 of the experienced one, but we also used the same method for the opposite direction. The average amount  
 405 of information necessary to fully predict the next rotation of the naïve bird is quantified by the marginal  
 406 entropy of its series of rotations  $H(N^{i+1}) = -\sum_{n_i} p(n_i) \log_2 p(n_i)$  (Figure 1, Venn diagram, lower-left set).  
 407 This is equal to 1 bit if the flight of the naïve bird is maximally uncertain (i.e., clockwise and counter-  
 408 clockwise rotations are equally likely) and to 0 bits if the flight is fully deterministic (i.e., rotations are either  
 409 all clockwise or all counter clockwise). As a result of temporal autocorrelation (Mitchell et al. 2019), part of  
 410 this information might be contained in the recent history of rotations of the naïve bird,  $n_i^{(k)} =$   
 411  $\{n_{i-k+1}, \dots, n_{i-1}, n_i\}$  for history length  $k$  (Figure 1, point 4, dark green entries in the naïve time series). The  
 412 remaining predictive information, which is not explained by the past behaviour of the naïve bird, is  
 413 quantified by the marginal entropy,

$$414 \quad H(N^{i+1}|N^{(k)}) = - \sum_{n_i^{(k)}, n_{i+1}} p(n_i^{(k)}, n_{i+1}) \log_2 \frac{p(n_i^{(k)}, n_{i+1})}{p(n_i^{(k)})},$$

415 of its future rotations,  $N^{i+1}$ , conditioned on the outcome of the past  $k$  rotations,  $N^{(k)}$  (Figure 1, Venn  
 416 diagram, overlap of the white and light purple areas).

417 Of interest to us was how much of this remaining information (necessary to predict the future  
 418 direction of rotation of the naïve bird) can be obtained by the current behaviour of the experienced bird  
 419 (Figure 1, points 4–6). This is given by the transfer entropy, which estimates the time-delayed effects on  
 420 the naïve bird of its interaction with the experienced one:  $T_{E \rightarrow N} = H(N^{i+1}|N^{(k)}) - H(N^{i+1}|N^{(k)}, E)$   
 421 (Schreiber 2000). Transfer entropy is time directional, from the present of one bird to the future of the other,

422 and considered for this reason a measure of information transfer (Lizier and Prokopenko 2010). It is defined  
423 as

$$424 \quad T_{E \rightarrow N} = \sum_{n_{i+1}, n_i^{(k)}, e_i} p(n_{i+1}, n_i^{(k)}, e_i) \log_2 \frac{p(n_{i+1} | n_i^{(k)}, e_i)}{p(n_{i+1} | n_i^{(k)})}$$

425 and formally measures the reduction of uncertainty of the future rotation  $N^{i+1}$  of the naïve bird given by  
426 knowledge of the current rotation  $E$  of the experienced bird at the net of possible autocorrelations in the  
427 naïve bird's past  $N^{(k)}$  (Figure 1, Venn diagram, area with red border). The logarithmic part of the above  
428 equation is known as local transfer entropy and measures over time whether the interaction at time  $i$   
429 (Figure 1, point 4, dark green and dark purple entries) was informative (positive) or misinformative  
430 (negative) (Lizier, Prokopenko, and Zomaya 2008).

431 The above information-theoretic measures were computed in R 3.6.1 using the `rinform-1.0.2`  
432 package (Moore et al. 2018) by estimating probabilities separately for each flight. To test whether causal  
433 interactions were significant, we also evaluated a surrogate dataset artificially created by pairing  
434 trajectories of birds that were not flown together: the trajectory of each experienced (or naïve) bird was  
435 paired with that of the naïve (or experienced) one from every other pair of birds not containing the same  
436 subjects.

437  
438 **Measuring exploration and exploitation.** Pairwise analysis of successive routes from the last three flights  
439 of the experienced bird during training (generation 1) showed that, once established, the bird largely  
440 remained within a point-to-point distance of 300 meters from its idiosyncratic route (Figure S3a). Therefore,  
441 we used 300 meters as a threshold to differentiate flight segments between those exploring new solutions  
442 and those exploiting known ones. We then compared the trajectories of consecutive flights for the same  
443 subjects to label each segment in the experimental and control datasets. For each focal trajectory that we  
444 aimed to label, we considered the trajectory of the previous release as a baseline trajectory for the  
445 comparison. In the case of paired birds (i.e., both experimental and fixed-pairs control), we considered the  
446 trajectory of the pair defined by the mean position of the two birds over time. For the first release of each  
447 generation in the experimental group, we used as baseline trajectory the last release of the previous  
448 generation because in this case there was no previous flight of the same pair to compare with. This  
449 approach to define exploration and exploitation led to a model of exploitation (i.e., the baseline trajectory)  
450 that varied over successive releases. Because the introduction of a naïve bird at each generation was likely  
451 to affect the baseline model of exploitation in a more pronounced manner than that of solo and fixed pairs  
452 of birds, this model might have been susceptible to differences between the experimental design of  
453 transmission chain experiments with respect to those of the two controls. To control for this scenario, we  
454 also explored an alternative approach where exploitation was defined on the basis of only information  
455 available to the experienced bird at the beginning of a new generation. In this case, the last release of the  
456 previous generation was used as the baseline trajectory for all releases within a given generation (see

457 Supplementary Methods). In both cases, we also measured the distance  $d_{EN}(i)$  between experienced and  
458 naïve birds to determine which bird was flying at the front of the pair for a given route segment.

459

## 460 **References**

461

462 Berdahl, Andrew M, Colin J Torney, Christos C Ioannou, Jolyon J Faria, and Iain D Couzin. 2013.

463 “Emergent Sensing of Complex Environments by Mobile Animal Groups.” *Science* 339 (6119): 574–  
464 76. <https://doi.org/10.1126/science.1225883>.

465 Biro, Dora, Jessica Meade, and Tim Guilford. 2004. “Familiar Route Loyalty Implies Visual Pilotage in the  
466 Homing Pigeon.” *Proceedings of the National Academy of Sciences* 101 (50): 17440–43.

467 <https://doi.org/10.1073/pnas.0406984101>.

468 Biro, Dora, Takao Sasaki, and Steven J Portugal. 2016. “Bringing a Time–Depth Perspective to Collective  
469 Animal Behaviour.” *Trends in Ecology & Evolution* 31 (7): 550–62.

470 <https://doi.org/10.1016/j.tree.2016.03.018>.

471 Biro, Dora, David J T Sumpter, Jessica Meade, and Tim Guilford. 2006. “From Compromise to Leadership  
472 in Pigeon Homing.” *Current Biology* 16 (21): 2123–28. <https://doi.org/10.1016/j.cub.2006.08.087>.

473 Bossomaier, Terry, Lionel Barnett, Michael Harré, and Joseph T Lizier. 2016. *An Introduction to Transfer  
474 Entropy*. Springer. <https://doi.org/10.1007/978-3-319-43222-9>.

475 Bracis, Chloe, and Thomas Mueller. 2017. “Memory, Not Just Perception, Plays an Important Role in  
476 Terrestrial Mammalian Migration.” *Proceedings of the Royal Society B: Biological Sciences* 284

477 (1855): 20170449. <https://doi.org/10.1098/rspb.2017.0449>.

478 Butail, Sachit, Violet Mwaffo, and Maurizio Porfiri. 2016. “Model-Free Information-Theoretic Approach to  
479 Infer Leadership in Pairs of Zebrafish.” *Phys. Rev. E* 93 (4): 42411.

480 <https://doi.org/10.1103/PhysRevE.93.042411>.

481 Conratt, Larissa. 2012. “Models in Animal Collective Decision-Making: Information Uncertainty and  
482 Conflicting Preferences.” *Interface Focus* 2 (2): 226–40. <https://doi.org/10.1098/rsfs.2011.0090>.

483 Conratt, Larissa, and T J Roper. 2003. “Group Decision-Making in Animals.” *Nature* 421 (6919): 155–58.  
484 <https://doi.org/10.1038/nature01294>.

485 Couzin, Iain D. 2009. “Collective Cognition in Animal Groups.” *Trends in Cognitive Sciences* 13 (1): 36–  
486 43. <https://doi.org/10.1016/j.tics.2008.10.002>.

487 Couzin, Iain D, Christos C Ioannou, Güven Demirel, Thilo Gross, Colin J Torney, Andrew Hartnett,  
488 Larissa Conratt, Simon A Levin, and Naomi E Leonard. 2011. “Uninformed Individuals Promote

489 Democratic Consensus in Animal Groups.” *Science* 334 (6062): 1578 LP – 1580.

490 <https://doi.org/10.1126/science.1210280>.

491 Couzin, Iain D, Jens Krause, Nigel R Franks, and Simon A Levin. 2005. “Effective Leadership and  
492 Decision-Making in Animal Groups on the Move.” *Nature* 433 (7025): 513–16.

493 <https://doi.org/10.1038/nature03236>.



- 494 Cover, Thomas M, and Joy A Thomas. 2005. *Elements of Information Theory. Elements of Information*  
495 *Theory*. Hoboken, NJ, USA: John Wiley & Sons, Inc. <https://doi.org/10.1002/047174882X>.
- 496 Crosato, Emanuele, Li Jiang, Valentin Lecheval, Joseph T Lizier, X Rosalind Wang, Pierre Tichit, Guy  
497 Theraulaz, and Mikhail Prokopenko. 2018. "Informative and Misinformative Interactions in a School  
498 of Fish." *Swarm Intelligence*. <https://doi.org/10.1007/s11721-018-0157-x>.
- 499 Davies, Nicholas B, John R Krebs, and Stuart A West. 2012. *An Introduction to Behavioural Ecology*.  
500 John Wiley & Sons.
- 501 Flack, Andrea, Benjamin Pettit, Robin Freeman, Tim Guilford, and Dora Biro. 2012. "What Are Leaders  
502 Made of? The Role of Individual Experience in Determining Leader–Follower Relations in Homing  
503 Pigeons." *Animal Behaviour* 83 (3): 703–9. <https://doi.org/10.1016/j.anbehav.2011.12.018>.
- 504 Freeman, Robin, Richard Mann, Tim Guilford, and Dora Biro. 2011. "Group Decisions and Individual  
505 Differences: Route Fidelity Predicts Flight Leadership in Homing Pigeons (*Columba Livia*)." *Biology*  
506 *Letters* 7 (1): 63–66. <https://doi.org/10.1098/rsbl.2010.0627>.
- 507 Fu, Wai-Tat, and Wayne D Gray. 2006. "Suboptimal Tradeoffs in Information Seeking." *Cognitive*  
508 *Psychology* 52 (3): 195–242. <https://doi.org/10.1016/j.cogpsych.2005.08.002>.
- 509 Garland, Joshua, Andrew M Berdahl, Jie Sun, and Erik M Bollt. 2018. "Anatomy of Leadership in  
510 Collective Behaviour." *Chaos: An Interdisciplinary Journal of Nonlinear Science* 28 (7): 75308.  
511 <https://doi.org/10.1063/1.5024395>.
- 512 Gelblum, Aviram, Ehud Fonio, Yoav Rodeh, Amos Korman, and Ofer Feinerman. 2020. "Ant Collective  
513 Cognition Allows for Efficient Navigation through Disordered Environments." Edited by Gordon J  
514 Berman. *ELife* 9 (May): e55195. <https://doi.org/10.7554/eLife.55195>.
- 515 Gelblum, Aviram, Itai Pinkoviezky, Ehud Fonio, Abhijit Ghosh, Nir Gov, and Ofer Feinerman. 2015. "Ant  
516 Groups Optimally Amplify the Effect of Transiently Informed Individuals." *Nature Communications* 6.  
517 <https://doi.org/10.1038/ncomms8729>.
- 518 Gelblum, Aviram, Itai Pinkoviezky, Ehud Fonio, Nir S Gov, and Ofer Feinerman. 2016. "Emergent  
519 Oscillations Assist Obstacle Negotiation during Ant Cooperative Transport." *Proceedings of the*  
520 *National Academy of Sciences* 113 (51): 14615–20. <https://doi.org/10.1073/pnas.1611509113>.
- 521 Guilford, Tim, and Dora Biro. 2014. "Route Following and the Pigeon's Familiar Area Map." *Journal of*  
522 *Experimental Biology* 217 (2): 169–79. <https://doi.org/10.1242/jeb.092908>.
- 523 Guinea, Miguel de, Alejandro Estrada, Karline R M Janmaat, K Anne-Isola Nekaris, and Sarie Van Belle.  
524 2021. "Disentangling the Importance of Social and Ecological Information in Goal-Directed  
525 Movements in a Wild Primate." *Animal Behaviour* 173: 41–51.  
526 <https://doi.org/10.1016/j.anbehav.2020.12.017>.
- 527 Helfman, Gene S, and Eric T Schultz. 1984. "Social Transmission of Behavioural Traditions in a Coral  
528 Reef Fish." *Animal Behaviour* 32 (2): 379–84. [https://doi.org/10.1016/S0003-3472\(84\)80272-9](https://doi.org/10.1016/S0003-3472(84)80272-9).
- 529 Hills, Thomas T, Peter M Todd, David Lazer, A David Redish, and Iain D Couzin. 2015. "Exploration  
530 versus Exploitation in Space, Mind, and Society." *Trends in Cognitive Sciences* 19 (1): 46–54.

- 531 <https://doi.org/10.1016/j.tics.2014.10.004>.
- 532 Jesmer, Brett R, Jerod A Merkle, Jacob R Goheen, Ellen O Aikens, Jeffrey L Beck, Alyson B  
533 Courtemanch, Mark A Hurley, et al. 2018. "Is Ungulate Migration Culturally Transmitted? Evidence  
534 of Social Learning from Translocated Animals." *Science* 361 (6406): 1023–25.  
535 <https://doi.org/10.1126/science.aat0985>.
- 536 Jorge, Paulo E, and Paulo A M Marques. 2012. "Decision-Making in Pigeon Flocks: A Democratic View of  
537 Leadership." *Journal of Experimental Biology* 215 (14): 2414–17. <https://doi.org/10.1242/jeb.070375>.
- 538 Kao, Albert B, Noam Miller, Colin Torney, Andrew Hartnett, and Iain D Couzin. 2014. "Collective Learning  
539 and Optimal Consensus Decisions in Social Animal Groups." *PLOS Computational Biology* 10 (8):  
540 1–11. <https://doi.org/10.1371/journal.pcbi.1003762>.
- 541 Kim, Changsu, Tommaso Ruberto, Paul Phamduy, and Maurizio Porfiri. 2018. "Closed-Loop Control of  
542 Zebrafish Behaviour in Three Dimensions Using a Robotic Stimulus." *Scientific Reports* 8 (1): 657.  
543 <https://doi.org/10.1038/s41598-017-19083-2>.
- 544 Krause, Jens, and Graeme D Ruxton. 2002. *Living in Groups*. Oxford University Press.
- 545 Krause, Jens, Graeme D Ruxton, and Stefan Krause. 2010. "Swarm Intelligence in Animals and  
546 Humans." *Trends in Ecology & Evolution* 25 (1): 28–34.  
547 <https://doi.org/https://doi.org/10.1016/j.tree.2009.06.016>.
- 548 Laland, Kevin N, and Kerry Williams. 1998. "Social Transmission of Maladaptive Information in the  
549 Guppy." *Behavioral Ecology* 9 (5): 493–99. <https://doi.org/10.1093/beheco/9.5.493>.
- 550 Lizier, Joseph T, and Mikhail Prokopenko. 2010. "Differentiating Information Transfer and Causal Effect."  
551 *The European Physical Journal B* 73 (4): 605–15. <https://doi.org/10.1140/epjb/e2010-00034-5>.
- 552 Lizier, Joseph T, Mikhail Prokopenko, and Albert Y Zomaya. 2008. "Local Information Transfer as a  
553 Spatiotemporal Filter for Complex Systems." *Phys. Rev. E* 77 (2): 26110.  
554 <https://doi.org/10.1103/PhysRevE.77.026110>.
- 555 Meade, Jessica, Dora Biro, and Tim Guilford. 2005. "Homing Pigeons Develop Local Route Stereotypy."  
556 *Proceedings of the Royal Society B: Biological Sciences* 272 (1558): 17–23.  
557 <https://doi.org/10.1098/rspb.2004.2873>.
- 558 Mehlhorn, Katja, Ben R Newell, Peter M Todd, Michael D Lee, Kate Morgan, Victoria A Braithwaite,  
559 Daniel Hausmann, Klaus Fiedler, and Cleotilde Gonzalez. 2015. "Unpacking the Exploration–  
560 Exploitation Tradeoff: A Synthesis of Human and Animal Literatures." *Decision* 2 (3): 191–215.  
561 <https://doi.org/10.1037/dec0000033>.
- 562 Mitchell, David J, Antoine M Dujon, Christa Beckmann, and Peter A Biro. 2019. "Temporal  
563 Autocorrelation: A Neglected Factor in the Study of Behavioral Repeatability and Plasticity."  
564 *Behavioral Ecology*. <https://doi.org/10.1093/beheco/arz180>.
- 565 Moore, Douglas G, Gabriele Valentini, Sara Imari Walker, and Michael Levin. 2018. "Inform: Efficient  
566 Information-Theoretic Analysis of Collective Behaviors." *Frontiers in Robotics and AI* 5: 60.  
567 <https://doi.org/10.3389/frobt.2018.00060>.

- 568 Nagy, Máté, Zsuzsa Ákos, Dora Biro, and Tamás Vicsek. 2010. "Hierarchical Group Dynamics in Pigeon  
569 Flocks." *Nature* 464 (7290): 890–93. <https://doi.org/10.1038/nature08891>.
- 570 Pettit, Benjamin, Zsuzsa Ákos, Tamás Vicsek, and Dora Biro. 2015. "Speed Determines Leadership and  
571 Leadership Determines Learning during Pigeon Flocking." *Current Biology* 25 (23): 3132–37.  
572 <https://doi.org/10.1016/j.cub.2015.10.044>.
- 573 Pettit, Benjamin, Andrea Flack, Robin Freeman, Tim Guilford, and Dora Biro. 2013. "Not Just Passengers:  
574 Pigeons, *Columba Livia*, Can Learn Homing Routes While Flying with a More Experienced  
575 Conspecific." *Proceedings of the Royal Society B: Biological Sciences* 280 (1750): 20122160.  
576 <https://doi.org/10.1098/rspb.2012.2160>.
- 577 Pettit, Benjamin, Andrea Perna, Dora Biro, and David J T Sumpter. 2013. "Interaction Rules Underlying  
578 Group Decisions in Homing Pigeons." *Journal of The Royal Society Interface* 10 (89): 20130529.  
579 <https://doi.org/10.1098/rsif.2013.0529>.
- 580 Pilkiewicz, K R, B H Lemasson, M A Rowland, A Hein, J Sun, Andrew M Berdahl, M L Mayo, et al. 2020.  
581 "Decoding Collective Communications Using Information Theory Tools." *Journal of The Royal*  
582 *Society Interface* 17 (164): 20190563. <https://doi.org/10.1098/rsif.2019.0563>.
- 583 Pirolli, Peter. 2007. *Information Foraging Theory: Adaptive Interaction with Information*. New York, NY,  
584 USA: Oxford University Press.
- 585 Porfiri, Maurizio. 2018. "Inferring Causal Relationships in Zebrafish-Robot Interactions through Transfer  
586 Entropy: A Small Lure to Catch a Big Fish." *Animal Behavior and Cognition* 5 (4): 341–67.  
587 <https://doi.org/10.26451/abc.05.04.03.2018>.
- 588 Ray, Subash K, Gabriele Valentini, Purva Shah, Abid Haque, Chris R Reid, Gregory F Weber, and Simon  
589 Garnier. 2019. "Information Transfer During Food Choice in the Slime Mold *Physarum*  
590 *Polycephalum*." *Frontiers in Ecology and Evolution* 7: 67. <https://doi.org/10.3389/fevo.2019.00067>.
- 591 Sasaki, Takao, and Dora Biro. 2017. "Cumulative Culture Can Emerge from Collective Intelligence in  
592 Animal Groups." *Nature Communications* 8 (1): 15049. <https://doi.org/10.1038/ncomms15049>.
- 593 Sasaki, Takao, Richard P Mann, Katherine N Warren, Tristian Herbert, Tara Wilson, and Dora Biro. 2018.  
594 "Personality and the Collective: Bold Homing Pigeons Occupy Higher Leadership Ranks in Flocks."  
595 *Philosophical Transactions of the Royal Society B: Biological Sciences* 373 (1746): 20170038.  
596 <https://doi.org/10.1098/rstb.2017.0038>.
- 597 Schreiber, Thomas. 2000. "Measuring Information Transfer." *Physical Review Letters* 85 (2): 461–64.  
598 <https://doi.org/10.1103/PhysRevLett.85.461>.
- 599 Stephens, David W, and John R Krebs. 1986. *Foraging Theory*. Vol. 1. Princeton, New Jersey, USA:  
600 Princeton University Press.
- 601 Stone, Lawrence D. 1976. *Theory of Optimal Search*. New York, NY, USA: Academic Press.
- 602 Valentini, Gabriele, Nobuaki Mizumoto, Stephen C Pratt, Theodore P Pavlic, and Sara Imari Walker.  
603 2020. "Revealing the Structure of Information Flows Discriminates Similar Animal Social Behaviors."  
604 *ELife* 9: e55395. <https://doi.org/10.7554/eLife.55395>.

- 605 Valentini, Gabriele, Theodore P Pavlic, Sara Imari Walker, Stephen C Pratt, Dora Biro, and Takao Sasaki.  
606 2021. "Data and Code from: Naïve Individuals Promote Collective Exploration in Homing Pigeons."  
607 *Figshare*. <https://doi.org/10.6084/m9.figshare.14043362>.  
608 Vicsek, Tamás, and Anna Zafeiris. 2012. "Collective Motion." *Physics Reports* 517 (3): 71–140.  
609 <https://doi.org/10.1016/j.physrep.2012.03.004>.  
610 Watts, Isobel, Benjamin Pettit, Máté Nagy, Theresa Burt de Perera, and Dora Biro. 2016. "Lack of  
611 Experience-Based Stratification in Homing Pigeon Leadership Hierarchies." *Royal Society Open*  
612 *Science* 3 (1): 150518. <https://doi.org/10.1098/rsos.150518>.

613

## 614 **Acknowledgements**

615 GV, TPP, SIW, and SCP were supported by NSF grant No. PHY-1505048 awarded to SIW, TPP, and SCP.  
616 GV was also supported by research funds from Arizona State University to Prof. Bert Hölldobler. DB was  
617 supported by grant No. TWCF0316 from the Templeton World Charity Foundation's "Diverse Intelligences"  
618 scheme. The authors would like to thank Dr. Albert B. Kao and Prof. Andrew Berdahl for helpful discussions.  
619

620

## 621 **Author contributions statement**

622 GV and TS designed the study with input from all authors. TS and DB provided data. GV analysed data  
623 with feedback from all authors. All authors contributed to the writing of the manuscript.  
624

625

## 626 **Additional information**

627 **Competing interests:** The authors declare no competing interest.

# Supplementary Information

## ***Naïve individuals promote collective exploration in homing pigeons***

**Gabriele Valentini, Theodore P. Pavlic, Sara Imari Walker, Stephen C. Pratt, Dora Biro & Takao Sasaki**

### **Methods**

**Relative position of birds over time.** We determined the relative position of each bird within the pair using the distance  $d_{EF}$  of the experienced bird from the naïve one projected onto the direction of motion of the flock. We modified the method proposed in (Nagy et al. 2010), which gives the distance of the experienced bird from the centre of the flock, to also include the segment from the centre of the flock to the naïve bird. This is given by

$$d_{EN}(i) = (\vec{x}_E(i) - \vec{x}_N(i)) \cdot \vec{v}_{pair}(i) \cdot 2,$$

where  $\vec{x}_E(i)$  and  $\vec{x}_N(i)$  are the positions of the experienced and the naïve bird and  $\vec{v}_{pair}(i)$  is the normalized velocity of the pair. The normalized velocity is computed as

$$\vec{v}_{pair}(i) = \frac{\langle \vec{x}_k(i) \rangle_k}{|\langle \vec{x}_k(i) \rangle_k|}$$

As the flock is composed of two birds only, the projected distance of the experienced bird from the naïve one projected onto the direction of motion of the pair is positive, when the experienced bird is flying *ahead* of the naïve one, and it is negative when the experienced bird is flying *behind*.

**Exploration–exploitation with respect to the previous generation.** Our primary approach to define exploration and exploitation is based on comparing pairs of successive releases using the trajectory of the previous release as our baseline model of exploitation and then labelling newer portions of a focal route as exploration. The model of exploitation (i.e., baseline trajectory) thus varies for each focal release similarly to a moving-average window over successive releases. An alternative approach to define exploration and exploitation is to consider a constant model of exploitation for each release within a given generation. This can be obtained by setting the baseline trajectory to equal the last trajectory of the previous generation. As a consequence, exploitation is defined on the basis of the information available only to the experienced bird at the beginning of a new generation; every portion of the route within that generation that is more than 300 meters away from the baseline is considered exploration.

At the first generation of the experimental group, when birds are trained individually for the successive transmission chain experiment and there is no previous generation available to provide us with

39 a baseline trajectory, we consider the first release as the baseline trajectory for the remainder of the  
40 generation. In the case of solo and fixed pairs controls, for which there is no obvious definition of a  
41 generation, we considered the 60 releases in each of these experiments as formed by 5 generations, each  
42 lasting 12 releases, and used an equivalent approach to that of the experimental group to define exploration  
43 and exploitation.

44

## 45 Results

46

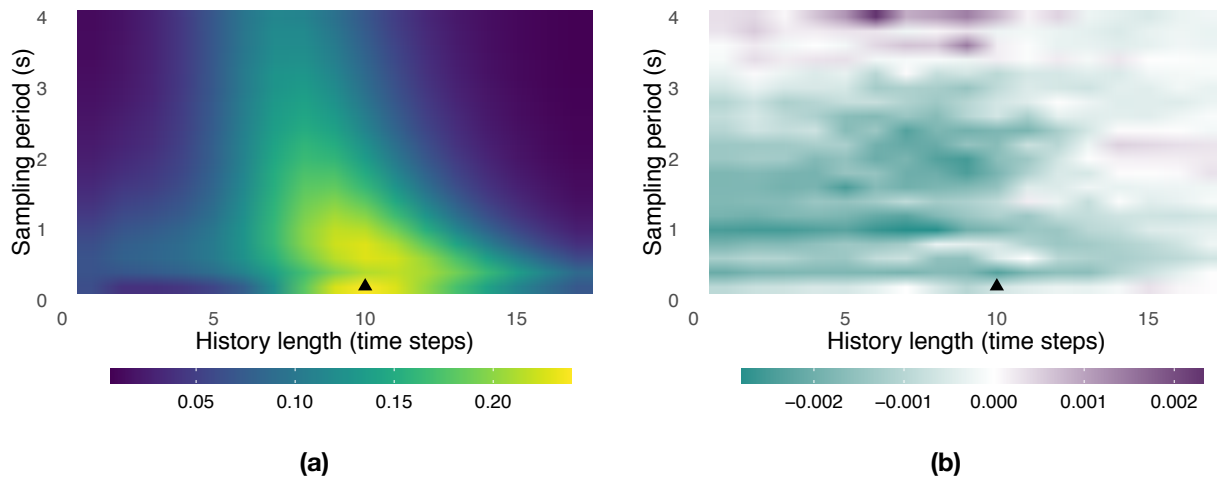

Figure S1. Landscape of information transfer as a function of the history length,  $k \in \{1, \dots, 17\}$ , and of the sampling period,  $\{0.2, 0.4, \dots, 4.0\}$  seconds. Panel (a) shows the total transfer of information between the pair of birds,  $T_{E \rightarrow N} + T_{N \rightarrow E}$ , averaged over all releases and generations. Panel (b) shows the net transfer of information between the pair of birds,  $T_{E \rightarrow N} - T_{N \rightarrow E}$ , averaged over all releases and generations. Positive (respectively, negative) values represent configurations where the experienced (naïve) bird is more informative than the naïve (experienced) one. The triangle represents the configuration with maximum total transfer of information.

47 **Landscape of information transfer and choice of parameters.** We first explored how information  
48 transfer between the birds varied as a function of two parameters: the sampling period (seconds) and the  
49 history length used in the computation of transfer entropy. Our original GPS data are sampled at a frequency  
50 of 1 sample every 0.2 seconds (5 Hz); we can further subsample these data by dropping samples, for  
51 example, using one sample every 0.4, 0.6, ..., 4.0 seconds as the sampling period. The history length  
52 represents the number of past rotations by the bird we want to predict that we consider when computing  
53 transfer entropy from the other bird in the pair.

54 The total transfer of information between the birds varies as a function of these parameters (Figure  
55 S1a). It peaks in the region delimited by history lengths of 8–10 time-steps and a sampling period between  
56 0.2–1.2 seconds, whereas it vanishes otherwise. The total transfer of information, which is generally  
57 adopted as a measure to choose study parameters (Porfiri 2018), reaches its maximum for a history length  
58 of  $k = 10$  at one sample every 0.2 seconds (black triangle in Figure S1a). We use this parameter  
59 configuration for the rest of our information-theoretic analysis. For this and for most other parameter  
60 configurations, the naïve bird is more informative about the future behaviour of the experienced one than



61 the other way around (Figure S1b). Only in two regions, both far from the point maximizing the total transfer  
 62 of information, is the experienced bird more informative than the naïve one; however, the overall amount  
 63 of information transferred between birds in these regions is negligible.

64  
 65 **Comparison of information transfer with the surrogate dataset.** To verify their significance, we  
 66 compared our estimates of information transfer between the two birds with equivalent measurements taken  
 67 from the surrogate dataset. We expect causal effects measured in the original dataset to be stronger than  
 68 those found in the surrogate one. As shown in Table S1, our expectations are fully met: the original dataset  
 69 shows values of transfer entropy significantly higher than those observed in the surrogate dataset, both for  
 70 the entire dataset as well as for each separate generation.

71  
 72 *Table S1. Statistical comparison of information transfer between the original and the surrogate dataset over all*  
 73 *generations and over separate generations. Column 1 reports the generation and sample sizes. Columns 2 and 4 report*  
 74 *the differences between the mean value of transfer entropy of the original dataset and that of the surrogate dataset.*  
 75 *Columns 3 and 5 report the results of one-sided two-sample Whitney–Mann–Wilcoxon rank-sum tests with continuity*  
 76 *correction (p-value and W statistic) testing if the original dataset has significantly higher transfer entropy than the*  
 77 *surrogate one. Significant p-values are reported in bold.*

| Original vs surrogate dataset  |                                               |                                                    |                                               |                                                    |
|--------------------------------|-----------------------------------------------|----------------------------------------------------|-----------------------------------------------|----------------------------------------------------|
| Generation                     | $T_{E \rightarrow N} - T_{E \rightarrow N}^s$ | $H_1: T_{E \rightarrow N} > T_{E \rightarrow N}^s$ | $T_{N \rightarrow E} - T_{N \rightarrow E}^s$ | $H_1: T_{N \rightarrow E} > T_{N \rightarrow E}^s$ |
| All ( $n = 343, n^s = 29035$ ) | $\mu = 0.0089$                                | <b><math>p &lt; .001</math></b> ( $W = 6145522$ )  | $\mu = 0.0088$                                | <b><math>p &lt; .001</math></b> ( $W = 6126284$ )  |
| 2 ( $n = 94, n^s = 7912$ )     | $\mu = 0.0062$                                | <b><math>p &lt; .001</math></b> ( $W = 445262$ )   | $\mu = 0.0074$                                | <b><math>p &lt; .001</math></b> ( $W = 452733$ )   |
| 3 ( $n = 99, n^s = 9801$ )     | $\mu = 0.0094$                                | <b><math>p &lt; .001</math></b> ( $W = 615721.5$ ) | $\mu = 0.0119$                                | <b><math>p &lt; .001</math></b> ( $W = 645665.5$ ) |
| 4 ( $n = 81, n^s = 6561$ )     | $\mu = 0.0071$                                | <b><math>p = .006</math></b> ( $W = 308433.5$ )    | $\mu = 0.0057$                                | <b><math>p = .015</math></b> ( $W = 303085.5$ )    |
| 5 ( $n = 69, n^s = 4761$ )     | $\mu = 0.0111$                                | <b><math>p &lt; .001</math></b> ( $W = 214258.5$ ) | $\mu = 0.0075$                                | <b><math>p = .002</math></b> ( $W = 197618.5$ )    |

78  
 79 **Analysis of time spent by each bird at the front of the pair.** We divided each flight into different  
 80 segments, with each segment representing a consecutive portion of the route with either the experienced  
 81 or the naïve bird at the front of the pair, and then measured the segment durations (Figure S2). The  
 82 distribution of segment durations resembles a log-normal distribution for both the entire dataset and for  
 83 individual generations. Experienced and naïve birds are characterized by very similar distributions closely  
 84 overlapping each other. Overall, the naïve bird spent significantly longer periods of time at the front of the  
 85 pair (Table S2), but the difference is small and largely driven by that of generation 3 (the only generation  
 86 showing significant differences). With the exception of generation 3, the experienced and the naïve bird  
 87 spent, on average, an approximately equal portion of the route at the front of the pair (Table S3). At  
 88 generation 3, the naïve bird was at the front of the pair for a significantly larger portion of the route with  
 89 respect to the experienced bird (respectively, 54% versus 46%).

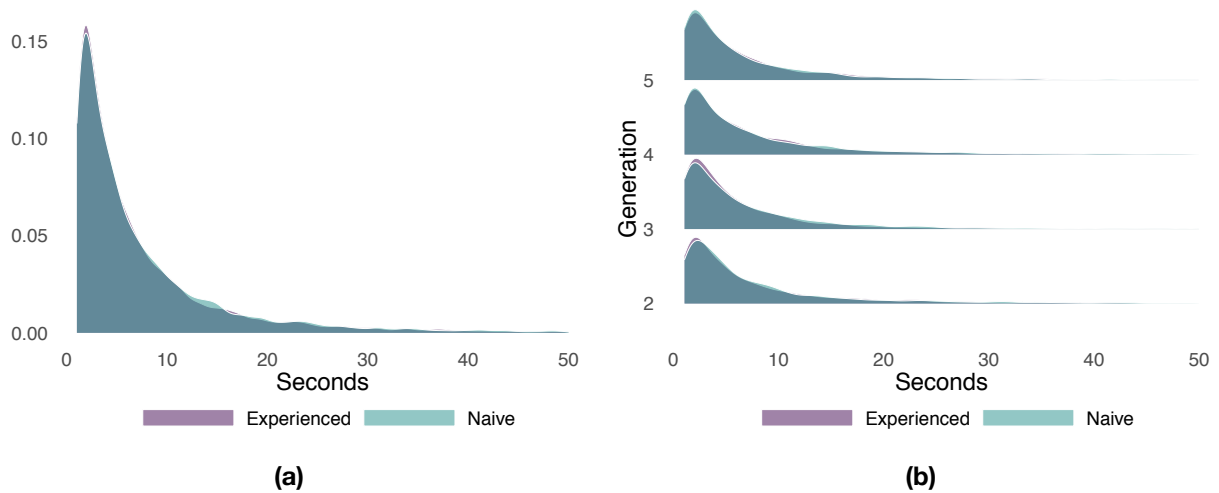

90  
91  
92  
93  
94  
95  
96  
97  
98  
**(a)** **(b)**  
 Figure S2. Probability density function of the duration of flight segments with either the experienced or the naïve bird at the front of the pair. Panel (a) shows the results aggregated over all generations. Panel (b) shows the results separately for each generation.

94  
95  
96  
97  
98  
 Table S2. Statistics about the duration of flight segments with either the experienced or the naïve bird at the front of the pair. Column 1 reports the generation and sample sizes. Columns 2 and 3 give the mean duration and the standard deviation of segments for the experienced and for the naïve bird. Column 4 reports the results of two-sided two-sample Whitney–Mann–Wilcoxon rank-sum tests with continuity correction ( $p$ -value and  $W$  statistic) testing differences between the distribution of the duration  $D$  of flight segments for the two birds. Significant  $p$ -values are reported in bold.

| Generation                         | Experienced                  | Naïve                        | $H_1: D_E \neq D_N$                               |
|------------------------------------|------------------------------|------------------------------|---------------------------------------------------|
| All ( $n^E = 10725, n^N = 10773$ ) | $\mu = 7.93, \sigma = 12.92$ | $\mu = 8.23, \sigma = 14.12$ | <b><math>p = .047</math></b> ( $W = 56865638$ )   |
| 2 ( $n^E = 2512, n^N = 2492$ )     | $\mu = 8.89, \sigma = 17.51$ | $\mu = 8.81, \sigma = 13.55$ | $p = .13$ ( $W = 3052262$ )                       |
| 3 ( $n^E = 3690, n^N = 3737$ )     | $\mu = 6.83, \sigma = 9.08$  | $\mu = 7.96, \sigma = 14.51$ | <b><math>p &lt; .001</math></b> ( $W = 6588674$ ) |
| 4 ( $n^E = 2297, n^N = 2283$ )     | $\mu = 8.63, \sigma = 13.65$ | $\mu = 8.55, \sigma = 14.23$ | $p = .86$ ( $W = 2630132$ )                       |
| 5 ( $n^E = 2226, n^N = 2261$ )     | $\mu = 7.98, \sigma = 11.23$ | $\mu = 7.73, \sigma = 13.93$ | $p = .23$ ( $W = 2568854$ )                       |

99  
100  
101  
102  
103  
104  
 Table S3. Statistics about the proportion of a flight with either the experienced or the naïve bird at the front of the pair. Column 1 reports the generation and sample size. Columns 2 and 3 give the mean and the standard deviation of the proportion of a flight with either the experienced or the naïve bird at the front of the pair. Column 4 reports the results of two-sided paired Wilcoxon signed-rank tests with continuity correction ( $p$ -value and  $V$  statistic) testing differences between the distribution of the proportion  $P$  of a flight for the two birds. Significant  $p$ -values are reported in bold.

| Generation        | Experienced                 | Naïve                       | $H_1: P_E \neq P_N$                        |
|-------------------|-----------------------------|-----------------------------|--------------------------------------------|
| All ( $n = 341$ ) | $\mu = 0.49, \sigma = 0.2$  | $\mu = 0.51, \sigma = 0.2$  | $p = .46$ ( $V = 27817.5$ )                |
| 2 ( $n = 92$ )    | $\mu = 0.51, \sigma = 0.23$ | $\mu = 0.49, \sigma = 0.23$ | $p = .69$ ( $V = 2243$ )                   |
| 3 ( $n = 99$ )    | $\mu = 0.46, \sigma = 0.17$ | $\mu = 0.54, \sigma = 0.17$ | <b><math>p = .03</math></b> ( $V = 1851$ ) |
| 4 ( $n = 81$ )    | $\mu = 0.5, \sigma = 0.2$   | $\mu = 0.5, \sigma = 0.2$   | $p = .84$ ( $V = 1705$ )                   |
| 5 ( $n = 69$ )    | $\mu = 0.49, \sigma = 0.2$  | $\mu = 0.51, \sigma = 0.2$  | $p = .95$ ( $V = 1219$ )                   |

106 **Exploration versus exploitation with respect to successive releases.** We used a distance-based  
 107 mechanism to label portions of a focal route as either exploration or exploitation depending on their point-  
 108 to-point distance from the baseline trajectory at the previous release. To determine a suitable threshold, we  
 109 compared successive trajectories flown by the experienced bird towards the end of training (generation 1,  
 110 last three flights) and studied the distribution of distances between successive trajectories (Figure S3a).  
 111 The distribution of distances is right-skewed and approximately exponential. A threshold of 300 meters  
 112 captures a large portion of the probability mass, about 70.5%, whereas larger distances are progressively  
 113 less likely. On this basis, we set a threshold of 300 meters to distinguish between phases of exploitation  
 114 (< 300 meters) and phases of exploration ( $\geq$  300 meters). Figure S3b shows the distribution of distances  
 115 between consecutive flights observed during each generation whereas Figure S4a shows the same results  
 116 aggregated over all generations as well as the proportion of time (inset) that each bird is leading as a  
 117 function of the same distance. Figures S4b and S4c show similar results for fixed pairs of birds and solo  
 118 individuals. Whereas fixed pairs are characterized by a distribution similar to that of experimental pairs, solo  
 119 birds have a markedly shifted distribution towards exploitation at the expense of exploration.

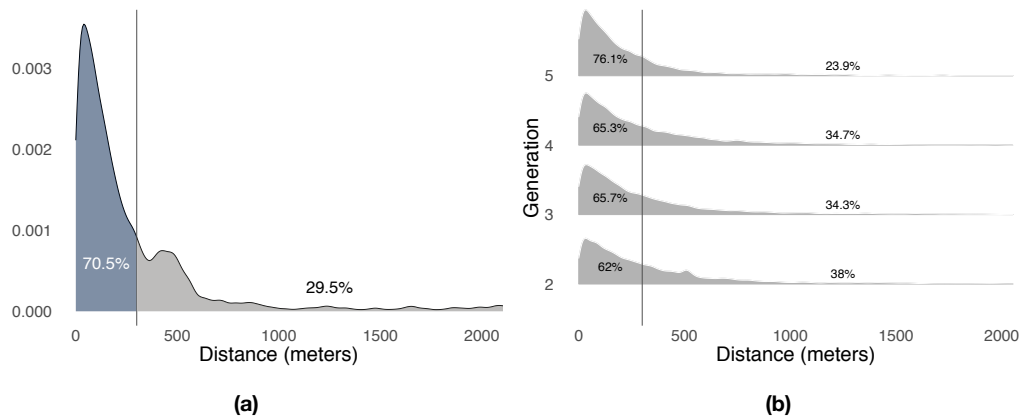

120 **(a)** **(b)**  
 121 *Figure S3. Distribution of minimum distances between the pairs of consecutive flights. Panel (a) shows the results for*  
 122 *the trained birds during the first generation of the experiment. Panel (b) shows the results for the pair of birds during all*  
 123 *remaining generations of the experiments. Vertical lines highlight the division of the probability mass between*  
 124 *exploitation (left) and exploration (right) defined by a 300 meters threshold.*

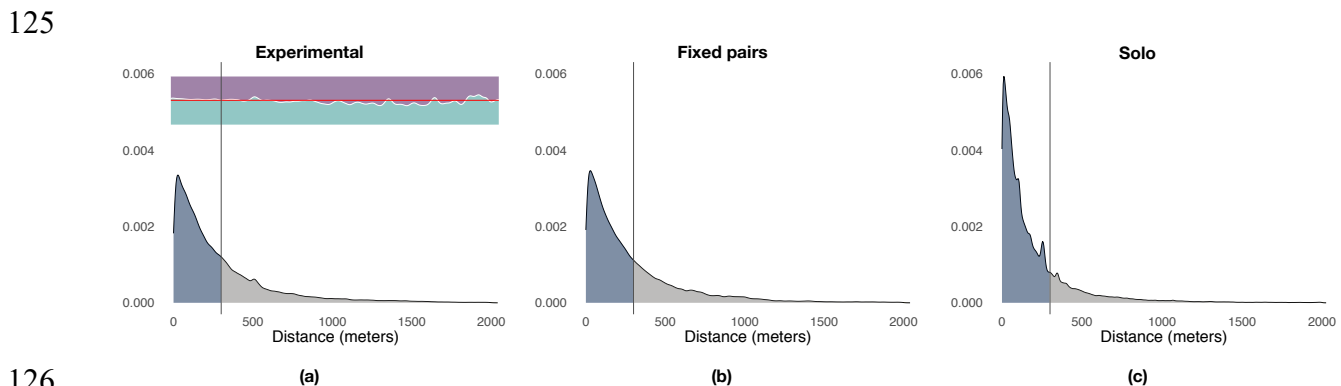

126 **(a)** **(b)** **(c)**  
 127 *Figure S4. Illustration of the distribution of point-to-point distances between pairs of consecutive flights highlighting the*  
 128 *300 meter threshold that demarks the end of exploitation and the beginning on exploration. Panel (a) reports the results*  
 129 *for experimental pairs over generations 2–5, panel (b) reports those for the fixed pairs control, and panel (c) those for*

130 *the solo control. The inset in panel (a) shows the proportion of times each bird is leading the flock as a function of the*  
 131 *distance between current and previous trajectory (purple represents the experienced bird, green the naïve one).*

132 We compared the proportion of exploration and exploitation across experimental conditions before the  
 133 beginning (*i.e.*, generation 1) and during transmission chain experiments (*i.e.*, generation 2 to 5). During  
 134 the first 12 releases (Table S4), individuals from the experimental group that flew solo during generation 1  
 135 could not be distinguished from birds in the solo control whereas fixed pairs of birds showed levels of  
 136 exploration significantly higher than those of solo birds. During releases 13 to 60, that is, when naïve  
 137 individuals are iteratively introduced in the transmission chains at the beginning of each generation,  
 138 experimental pairs showed instead significantly higher levels of exploration than both solo and fixed pairs  
 139 of birds, with these former exploring much less than birds that flew in pairs.

140  
 141 *Table S4. Statistical comparison of mean proportions of a flight spent exploring versus exploiting across treatments*  
 142 *(experimental pairs, solo and fixed pairs controls) for the first 12 releases (generation 1) and for releases 13 to 60*  
 143 *(generation 2 to 5). Entries report the proportion of exploration vs exploitation for pairs of treatments as well as the*  
 144 *results of two-sided two-sample Whitney–Mann–Wilcoxon rank-sum tests with continuity correction (*p*-value and *W**  
 145 *statistic) for differences in proportion of exploration. Significant *p*-values are reported in bold. Results of testing for the*  
 146 *proportion of exploitation are equivalent and not repeated below.*

| Releases | Dataset                 | Solo control                                                                                  | Fixed pairs control                                                                         |
|----------|-------------------------|-----------------------------------------------------------------------------------------------|---------------------------------------------------------------------------------------------|
| 1 to 12  | Experimental (gen. 1)   | Row: 36.7% vs 63.3%<br>Col: 34.2% vs 65.8%<br><i>p</i> = .55 ( <i>W</i> = 5288)               | Row: 36.7% vs 63.3%<br>Col: 51.7% vs 48.3%<br><b><i>p</i> &lt; .001</b> ( <i>W</i> = 2230)  |
|          | Solo control            | –                                                                                             | Row: 36.7% vs 63.3%<br>Col: 34.2% vs 65.8%<br><b><i>p</i> &lt; .001</b> ( <i>W</i> = 1837)  |
| 13 to 60 | Experimental (gen. 2-5) | Row: 32.9% vs 67.1%<br>Col: 15.7% vs 84.3%<br><b><i>p</i> &lt; .001</b> ( <i>W</i> = 94108.5) | Row: 32.9% vs 67.1%<br>Col: 29.3% vs 70.7%<br><b><i>p</i> = .0456</b> ( <i>W</i> = 50472)   |
|          | Solo control            | –                                                                                             | Row: 15.7% vs 84.3%<br>Col: 29.3% vs 70.7%<br><b><i>p</i> &lt; .001</b> ( <i>W</i> = 31517) |

147  
 148 **Exploration versus exploitation with respect to the previous generation.** In addition to the exploration–  
 149 exploitation analysis with respect to successive releases, we also performed a similar analysis where  
 150 exploitation is defined with respect to the previous generation (see supplementary Methods above) in order  
 151 to validate the robustness of the main results obtained with our primary approach. The distributions of point-  
 152 to-point distances between baseline and focal trajectories (Figure S5) resembled those observed when  
 153 comparing successive releases (Figure S4). Differences across experimental and control treatments (Table  
 154 S5) were much more pronounced under this model but in line with the results obtained above (Table S4).  
 155 Moreover, the overall exploration trends reported in Figure S6 showed the same signatures of the analysis  
 156 over successive releases (Figure 5a). Exploration decreased over generations in all experimental  
 157 conditions with experimental pairs exploring more than both fixed pairs of birds and solo individuals.

158  
 159  
 160

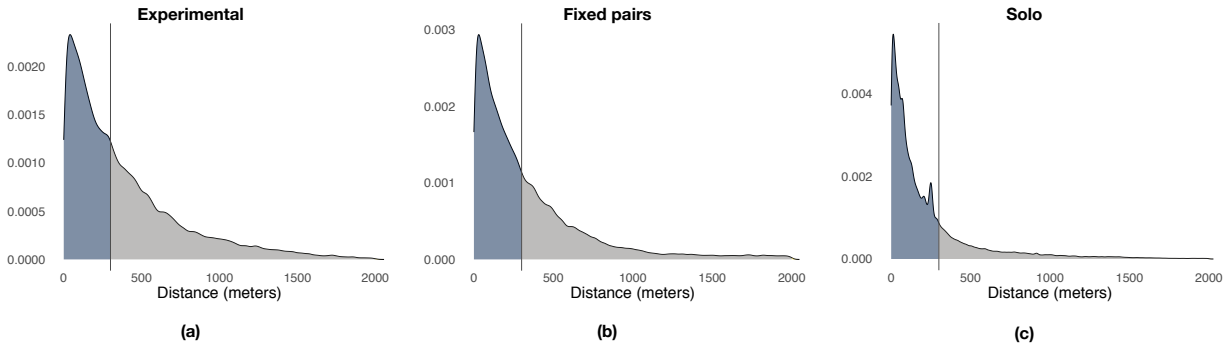

161  
162 *Figure S5. Illustration of the distribution of point-to-point distances between each flight of a generation (focal*  
163 *trajectories) and the last flight of the previous generation (baseline trajectory). Colors and vertical lines highlight the*  
164 *300 meter threshold that demarks the end of exploitation and the beginning of exploration. Panel (a) reports the results*  
165 *for experimental pairs over generations 2–5, panel (b) reports those for the fixed pairs control, and panel (c) those for*  
166 *the solo control.*

167  
168 *Table S5. Statistical comparison of mean proportions of a flight spent exploring versus exploiting across treatments*  
169 *(experimental pairs, solo and fixed pairs controls) for the first 12 releases (generation 1) and for releases 13 to 60*  
170 *(generation 2 to 5) when considering the last release at the previous generation as the baseline trajectory. Entries*  
171 *report the proportion of exploration vs exploitation for pairs of treatments as well as the results of two-sided two-sample*  
172 *Whitney–Mann–Wilcoxon rank-sum tests with continuity correction (*p*-value and *W* statistic) for differences in*  
173 *proportion of exploration. Significant *p*-values are reported in bold. Results of testing for the proportion of exploitation*  
174 *are equivalent and not repeated below.*

| Releases | Dataset                 | Solo control                                                                                 | Fixed pairs control                                                                         |
|----------|-------------------------|----------------------------------------------------------------------------------------------|---------------------------------------------------------------------------------------------|
| 1 to 12  | Experimental (gen. 1)   | Row: 61.5% vs 38.5%<br>Col: 55.8% vs 44.2%<br><i>p</i> = .11 ( <i>W</i> = 5592)              | Row: 61.5% vs 38.5%<br>Col: 82.9% vs 17.1%<br><b><i>p</i> &lt; .001</b> ( <i>W</i> = 1721)  |
|          | Solo control            | –                                                                                            | Row: 55.8% vs 44.2%<br>Col: 82.9% vs 17.1%<br><b><i>p</i> &lt; .001</b> ( <i>W</i> = 1163)  |
| 13 to 60 | Experimental (gen. 2-5) | Row: 46.6% vs 53.4%<br>Col: 18.9% vs 81.1%<br><b><i>p</i> &lt; .001</b> ( <i>W</i> = 103095) | Row: 46.6% vs 53.4%<br>Col: 32.4% vs 67.6%<br><b><i>p</i> &lt; .001</b> ( <i>W</i> = 60502) |
|          | Solo control            | –                                                                                            | Row: 18.9% vs 81.1%<br>Col: 32.4% vs 67.6%<br><b><i>p</i> &lt; .001</b> ( <i>W</i> = 30744) |

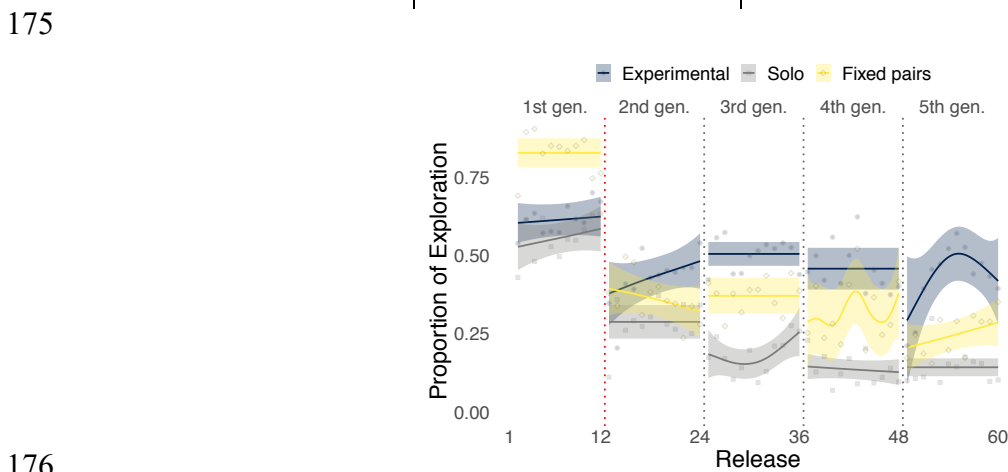

176  
177 *Figure S6. Illustration of the proportion of exploration (respectively, one minus the proportion of exploitation) over*  
178 *releases when considering the last release at the previous generation as the baseline trajectory. Results are shown for*

179 the experimental group, the solo control, and the fixed pairs control. The red dotted vertical line delineates the end of  
 180 the experimental group's training phase. Smoothed lines are computed with generalized additive models using  
 181 shrinkage cubic regression splines (mean and standard error); points represent averages for individual releases.

182 **The role of leadership during exploration and exploitation.** Using this distance-based mechanism, we  
 183 label each segment of a flight as either exploration or exploitation. For each segment, we keep track of  
 184 which bird, experienced or naïve, is leading the pair. We then compute the proportion of time spent by the  
 185 experienced bird and by the naïve one leading the pair during either an exploration or exploitation phase  
 186 (Table S6). The combined proportion of time of both birds in either exploration or exploitation gives instead  
 187 the corresponding contribution of the pair. Overall, each bird spends approximately 16.5% of the time  
 188 leading the pair during an exploration phase and 33.5% of the time leading the pair during an exploitation  
 189 phase. With the exception of exploitation phases in generation 3, there is no significant difference between  
 190 the proportion of time spent by the two bird in an exploration or exploitation phase (Table S7).

191  
 192 *Table S6. Proportion of a flight led by each of the two birds, calculated separately for exploration and exploitation*  
 193 *phases. Column 1 reports the generation and sample size. Columns 2 and 3 give the mean and the standard deviation*  
 194 *of the proportion of a flight led, respectively, by the experienced and the naïve bird for the case of exploration. Columns*  
 195 *4 and 5 give the mean and the standard deviation of the proportion of a flight led, respectively, by the experienced and*  
 196 *the naïve bird for the case of exploitation.*

| Generation    | Exploration                 |                             | Exploitation                |                             |
|---------------|-----------------------------|-----------------------------|-----------------------------|-----------------------------|
|               | Experienced                 | Naïve                       | Experienced                 | Naïve                       |
| All (n = 341) | $\mu = 0.17, \sigma = 0.15$ | $\mu = 0.16, \sigma = 0.13$ | $\mu = 0.32, \sigma = 0.18$ | $\mu = 0.35, \sigma = 0.2$  |
| 2 (n = 92)    | $\mu = 0.2, \sigma = 0.17$  | $\mu = 0.17, \sigma = 0.14$ | $\mu = 0.31, \sigma = 0.2$  | $\mu = 0.32, \sigma = 0.21$ |
| 3 (n = 99)    | $\mu = 0.16, \sigma = 0.13$ | $\mu = 0.19, \sigma = 0.13$ | $\mu = 0.3, \sigma = 0.16$  | $\mu = 0.36, \sigma = 0.17$ |
| 4 (n = 81)    | $\mu = 0.18, \sigma = 0.16$ | $\mu = 0.16, \sigma = 0.13$ | $\mu = 0.32, \sigma = 0.18$ | $\mu = 0.34, \sigma = 0.22$ |
| 5 (n = 69)    | $\mu = 0.13, \sigma = 0.13$ | $\mu = 0.1, \sigma = 0.1$   | $\mu = 0.37, \sigma = 0.17$ | $\mu = 0.4, \sigma = 0.21$  |

197  
 198 *Table S7. Statistical comparison of leadership by experienced vs. naïve birds, tested separately for exploration and*  
 199 *exploitation over all generations and over separate generations. Column 1 reports the generation and sample size.*  
 200 *Columns 2 and 3 report the results of two-sided paired Wilcoxon signed-rank tests with continuity correction (p-value*  
 201 *and V statistic) for differences in proportion of flight led between experienced and naïve birds for exploration and*  
 202 *exploitation, respectively. Significant p-values are reported in bold.*

| Generation    | Experienced vs Naïve  |                                         |
|---------------|-----------------------|-----------------------------------------|
|               | Exploration           | Exploitation                            |
| All (n = 341) | $p = .44$ (V = 28820) | $p = .13$ (V = 26240)                   |
| 2 (n = 92)    | $p = .17$ (V = 2490)  | $p = .71$ (V = 2048)                    |
| 3 (n = 99)    | $p = .08$ (V = 1891)  | <b><math>p = .035</math></b> (V = 1871) |
| 4 (n = 81)    | $p = .36$ (V = 1767)  | $p = .79$ (V = 1603)                    |
| 5 (n = 69)    | $p = .22$ (V = 1187)  | $p = .8$ (V = 1131)                     |



203  
 204 **Transitions between phases of exploration and exploitation.** Although once initiated, phases of  
 205 exploration and phases of exploitation are led in equal manner by the experienced and the naïve bird, the  
 206 experience unbalance within the pair might affect the likelihood of a bird to initiate transitions from one  
 207 phase of the exploration–exploitation process to other. To investigate this question, we measured transition  
 208 probabilities for both birds over generations (Table S8) and over releases (Table S9). Transitions from  
 209 exploration to exploitation are not significantly different between experienced and naïve birds, but  
 210 transitions from exploitation to exploration are significantly (albeit marginally) more likely to be initiated by  
 211 naïve birds. However, this result seems driven by the data of generation 3, where the naïve individual is  
 212 marginally but significantly more likely than the experienced one to initiate exploration phases, while in all  
 213 other generations both birds are equally likely to initiate changes in either direction. When looking at  
 214 transition probabilities over releases, we found a similar trend except for the first release where the naïve  
 215 bird is much more likely to initiate exploration phases.

216  
 217 *Table S8. Statistical comparison of the proportion of transitions from exploitation to exploration and from exploration to*  
 218 *exploitation led by the experienced and by the naïve bird over generations. Column 1 reports the generation number.*  
 219 *Columns 2 and 4 report the estimated probabilities that transitions are led by the experienced bird,  $P_E$ , and by the naïve*  
 220 *bird,  $P_N$ , for transitions, respectively, from exploitation to exploration and from exploration to exploitation. Columns 3*  
 221 *and 5 give the results of exact binomial tests ( $p$ -value and sample size  $n$ ) of the null hypothesis that the probability  $P_E$*   
 222 *that transitions are led by the experienced bird equals 0.5. Significant  $p$ -values are reported in bold.*

| Generation | Exploitation → Exploration |                                            | Exploration → Exploitation |                         |
|------------|----------------------------|--------------------------------------------|----------------------------|-------------------------|
|            | $P_E$ versus $P_N$         | $H_1: P_E \neq 0.5$                        | $P_E$ versus $P_N$         | $H_1: P_E \neq 0.5$     |
| All        | $P_E = 0.467, P_N = 0.533$ | <b><math>p = .042</math></b> ( $n = 964$ ) | $P_E = 0.513, P_N = 0.487$ | $p = .42$ ( $n = 966$ ) |
| 2          | $P_E = 0.494, P_N = 0.506$ | $p = .9$ ( $n = 247$ )                     | $P_E = 0.52, P_N = 0.48$   | $p = .56$ ( $n = 244$ ) |
| 3          | $P_E = 0.432, P_N = 0.568$ | <b><math>p = .02</math></b> ( $n = 301$ )  | $P_E = 0.483, P_N = 0.517$ | $p = .6$ ( $n = 300$ )  |
| 4          | $P_E = 0.5, P_N = 0.5$     | $p = 1$ ( $n = 216$ )                      | $P_E = 0.539, P_N = 0.461$ | $p = .28$ ( $n = 219$ ) |
| 5          | $P_E = 0.45, P_N = 0.55$   | $p = .18$ ( $n = 200$ )                    | $P_E = 0.522, P_N = 0.478$ | $p = .57$ ( $n = 203$ ) |

223  
 224 *Table S9. Statistical comparison of the proportion of transitions from exploitation to exploration and from exploration to*  
 225 *exploitation led by the experienced and by the naïve bird over releases. Column 1 reports the release number. Columns*  
 226 *2 and 4 report the estimated probabilities that transitions are led by the experienced bird,  $P_E$ , and by the naïve bird,  $P_N$ ,*  
 227 *for transitions, respectively, from exploitation to exploration and from exploration to exploitation. Columns 3 and 5 give*  
 228 *the results of exact binomial tests ( $p$ -value and sample size  $n$ ) of the null hypothesis that the probability  $P_E$  that*  
 229 *transitions are led by the experienced bird equals 0.5. Significant  $p$ -values are reported in bold.*

| Release | Exploitation → Exploration |                                             | Exploration → Exploitation |                        |
|---------|----------------------------|---------------------------------------------|----------------------------|------------------------|
|         | $P_E$ versus $P_N$         | $H_1: P_E \neq 0.5$                         | $P_E$ versus $P_N$         | $H_1: P_E \neq 0.5$    |
| 1       | $P_E = 0.295, P_N = 0.705$ | <b><math>p &lt; .01</math></b> ( $n = 44$ ) | $P_E = 0.477, P_N = 0.523$ | $p = .88$ ( $n = 44$ ) |
| 2       | $P_E = 0.478, P_N = 0.522$ | $p = .81$ ( $n = 69$ )                      | $P_E = 0.522, P_N = 0.478$ | $p = .81$ ( $n = 67$ ) |
| 3       | $P_E = 0.519, P_N = 0.481$ | $p = .83$ ( $n = 81$ )                      | $P_E = 0.575, P_N = 0.425$ | $p = .22$ ( $n = 80$ ) |
| 4       | $P_E = 0.576, P_N = 0.424$ | $p = .27$ ( $n = 66$ )                      | $P_E = 0.6, P_N = 0.4$     | $p = .14$ ( $n = 65$ ) |
| 5       | $P_E = 0.487, P_N = 0.513$ | $p = .91$ ( $n = 76$ )                      | $P_E = 0.519, P_N = 0.481$ | $p = .82$ ( $n = 77$ ) |
| 6       | $P_E = 0.54, P_N = 0.46$   | $p = .48$ ( $n = 100$ )                     | $P_E = 0.465, P_N = 0.535$ | $p = .55$ ( $n = 99$ ) |

|    |                            |                     |                            |                    |
|----|----------------------------|---------------------|----------------------------|--------------------|
| 7  | $P_E = 0.443, P_N = 0.557$ | $p = .34 (n = 88)$  | $P_E = 0.494, P_N = 0.506$ | $p = 1.0 (n = 89)$ |
| 8  | $P_E = 0.409, P_N = 0.591$ | $p = .18 (n = 66)$  | $P_E = 0.597, P_N = 0.403$ | $p = .14 (n = 67)$ |
| 9  | $P_E = 0.438, P_N = 0.562$ | $p = .22 (n = 112)$ | $P_E = 0.496, P_N = 0.504$ | $p = 1 (n = 115)$  |
| 10 | $P_E = 0.422, P_N = 0.578$ | $p = .17 (n = 90)$  | $P_E = 0.522, P_N = 0.478$ | $p = .75 (n = 92)$ |
| 11 | $P_E = 0.391, P_N = 0.609$ | $p = .053 (n = 87)$ | $P_E = 0.453, P_N = 0.547$ | $p = .45 (n = 86)$ |
| 12 | $P_E = 0.541, P_N = 0.459$ | $p = .52 (n = 85)$  | $P_E = 0.482, P_N = 0.518$ | $p = .83 (n = 85)$ |

230

231

232

233

## References

234

Nagy, Máté, Zsuzsa Ákos, Dora Biro, and Tamás Vicsek. 2010. "Hierarchical Group Dynamics in Pigeon Flocks." *Nature* 464 (7290): 890–93. <https://doi.org/10.1038/nature08891>.

235

236

Porfiri, Maurizio. 2018. "Inferring Causal Relationships in Zebrafish-Robot Interactions through Transfer Entropy: A Small Lure to Catch a Big Fish." *Animal Behavior and Cognition* 5 (4): 341–67.

237

238

<https://doi.org/10.26451/abc.05.04.03.2018>.

239
